# Supplementary material for: Design, synthesis, and biological evaluation of morpholinopyrimidine derivatives as anti-inflammatory agents
Source: Royal Society of Chemistry journal article supplement (doi:10.1039/d3ra01893h), 2023-01-01

**Supporting information**

**Design, Synthesis, and Biological Evaluation of Morpholinopyrimidine Derivatives as  
Anti-inflammatory agents**

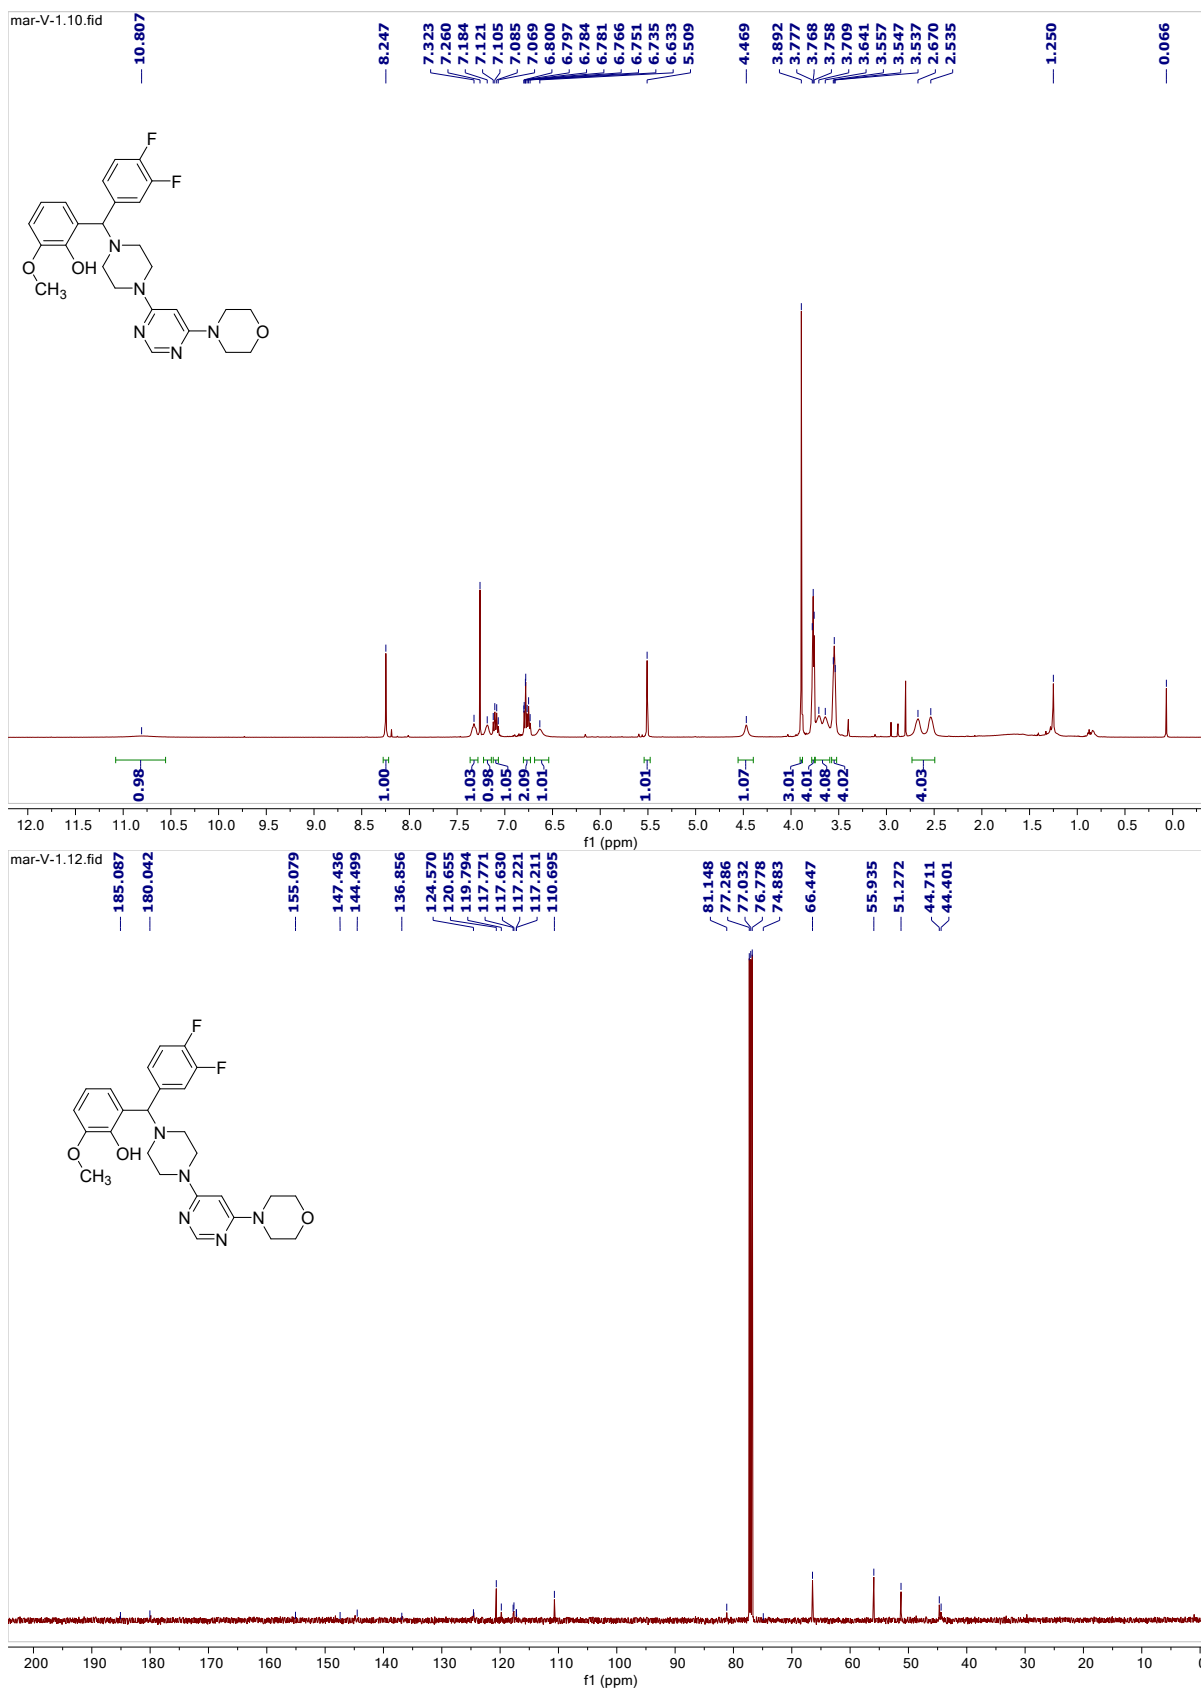

Figure 1: Top: 500 MHz <sup>1</sup>H-NMR of 2-((3,4-difluorophenyl)(4-(6-morpholinopyrimidin-4-yl)piperazin-1-yl)methyl)-6-methoxyphenol (**VI**). Bottom: 126 MHz <sup>13</sup>C-NMR of 2-((3,4-difluorophenyl)(4-(6-morpholinopyrimidin-4-yl)piperazin-1-yl)methyl)-6-methoxyphenol (**VI**).



## Mass Spectrum List Report

### Analysis Info

Analysis Name D:\Data\maxis2022\18933.d  
 Method ESI\_pos\_50\_1500\_os.m  
 Sample Name V1  
 Comment

Acquisition Date 17-Jun-22 1:39:52 PM  
 Operator Erlend  
 Instrument maXis II ETD 1823391.22318

### Acquisition Parameter

|             |            |                      |        |                  |           |
|-------------|------------|----------------------|--------|------------------|-----------|
| Source Type | ESI        | Set Capillary        | 3500 V | Set Nebulizer    | 0.3 Bar   |
| Focus       | Not active | Set End Plate Offset | -500 V | Set Dry Heater   | 200 °C    |
| Scan Begin  | 50 m/z     | Set Charging Voltage | 2000 V | Set Dry Gas      | 4.0 l/min |
| Scan End    | 1500 m/z   | Set Corona           | 0 nA   | Set Divert Valve | Waste     |
|             |            |                      |        | Set APCI Heater  | 0 °C      |

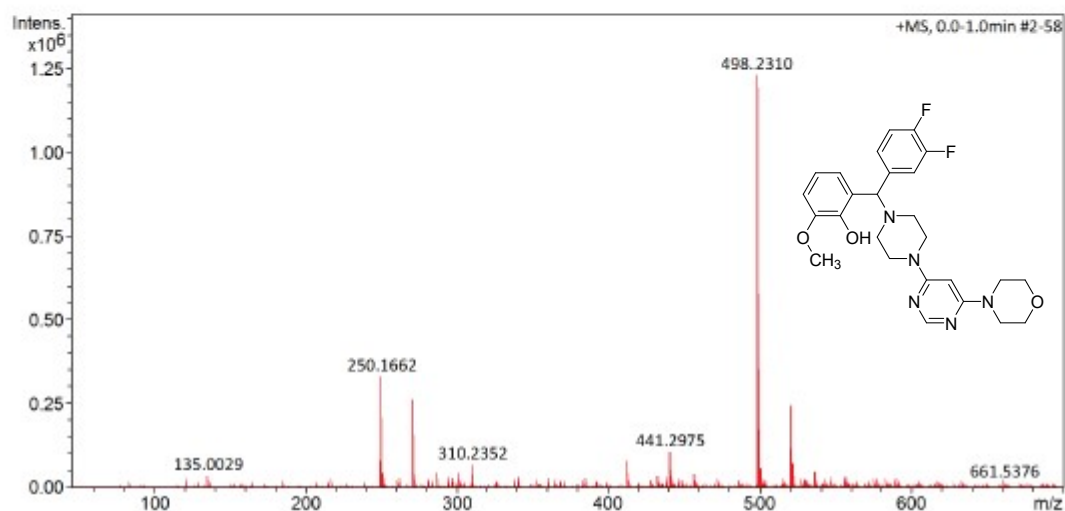

| #  | m/z      | Res.  | S/N     | I       | I%    | FWHM   |
|----|----------|-------|---------|---------|-------|--------|
| 1  | 135.0029 | 28219 | 1928.1  | 35818   | 2.9   | 0.0048 |
| 2  | 249.0722 | 34409 | 2579.9  | 81328   | 6.6   | 0.0072 |
| 3  | 250.1662 | 32522 | 10470.7 | 331804  | 27.0  | 0.0077 |
| 4  | 251.1692 | 30177 | 1433.0  | 45906   | 3.7   | 0.0083 |
| 5  | 262.1662 | 34816 | 741.4   | 26785   | 2.2   | 0.0075 |
| 6  | 271.0541 | 33949 | 6609.1  | 263892  | 21.5  | 0.0080 |
| 7  | 272.0575 | 33580 | 998.4   | 40073   | 3.3   | 0.0081 |
| 8  | 281.2451 | 35037 | 569.4   | 24681   | 2.0   | 0.0080 |
| 9  | 287.0280 | 35106 | 974.2   | 44229   | 3.6   | 0.0082 |
| 10 | 294.1924 | 35205 | 646.6   | 31019   | 2.5   | 0.0084 |
| 11 | 297.2400 | 36390 | 546.0   | 26779   | 2.2   | 0.0082 |
| 12 | 301.1411 | 36368 | 864.8   | 43066   | 3.5   | 0.0083 |
| 13 | 310.2352 | 35381 | 1254.1  | 67926   | 5.5   | 0.0088 |
| 14 | 338.2666 | 36363 | 362.7   | 23834   | 1.9   | 0.0093 |
| 15 | 341.2662 | 36969 | 457.5   | 30329   | 2.5   | 0.0092 |
| 16 | 360.3237 | 36506 | 387.7   | 28551   | 2.3   | 0.0099 |
| 17 | 385.2925 | 37824 | 326.2   | 26896   | 2.2   | 0.0102 |
| 18 | 413.2662 | 38031 | 869.7   | 81959   | 6.7   | 0.0109 |
| 19 | 433.3804 | 38580 | 347.9   | 34467   | 2.8   | 0.0112 |
| 20 | 441.2975 | 38763 | 1053.4  | 105884  | 8.6   | 0.0114 |
| 21 | 442.3010 | 38659 | 295.0   | 29744   | 2.4   | 0.0114 |
| 22 | 457.2733 | 31870 | 402.6   | 42004   | 3.4   | 0.0143 |
| 23 | 498.2310 | 39276 | 10836.8 | 1229668 | 100.0 | 0.0127 |
| 24 | 499.2342 | 38183 | 3210.9  | 365076  | 29.7  | 0.0131 |
| 25 | 500.2372 | 36840 | 512.7   | 58403   | 4.7   | 0.0136 |
| 26 | 520.2131 | 40227 | 2099.6  | 247010  | 20.1  | 0.0129 |
| 27 | 521.2163 | 38889 | 618.3   | 72836   | 5.9   | 0.0134 |
| 28 | 529.4954 | 39647 | 216.8   | 25925   | 2.1   | 0.0134 |
| 29 | 536.1871 | 40476 | 387.4   | 47189   | 3.8   | 0.0132 |
| 30 | 555.5112 | 39801 | 242.6   | 30356   | 2.5   | 0.0140 |

18933.d

Bruker Compass DataAnalysis 4.3

printed: 17-Jun-22 1:46:06 PM

by: Erlend

Page 1 of 1

Figure 2: HRMS report of 2-((3,4-difluorophenyl)(4-(6-morpholinopyrimidin-4-yl)piperazin-1-yl)methyl)-6-methoxyphenol (V1).

# Elemental Analysis Report

## Analysis Info

Sample Name V1

Method ESI\_pos\_50\_1500\_os.m

Acquisition Date 17-Jun-22 1:39:52 PM

Analysis Name D:\Data\maxis2022\18933.d

## Acquisition Parameter

|             |            |                      |        |                  |           |
|-------------|------------|----------------------|--------|------------------|-----------|
| Source Type | ESI        | Set Capillary        | 3500 V | Set Nebulizer    | 0.3 Bar   |
| Focus       | Not active | Set End Plate Offset | -500 V | Set Dry Heater   | 200 °C    |
| Scan Begin  | 50 m/z     | Set Charging Voltage | 2000 V | Set Dry Gas      | 4.0 l/min |
| Scan End    | 1500 m/z   | Set Corona           | 0 nA   | Set Divert Valve | Waste     |
|             |            |                      |        | Set APCI Heater  | 0 °C      |

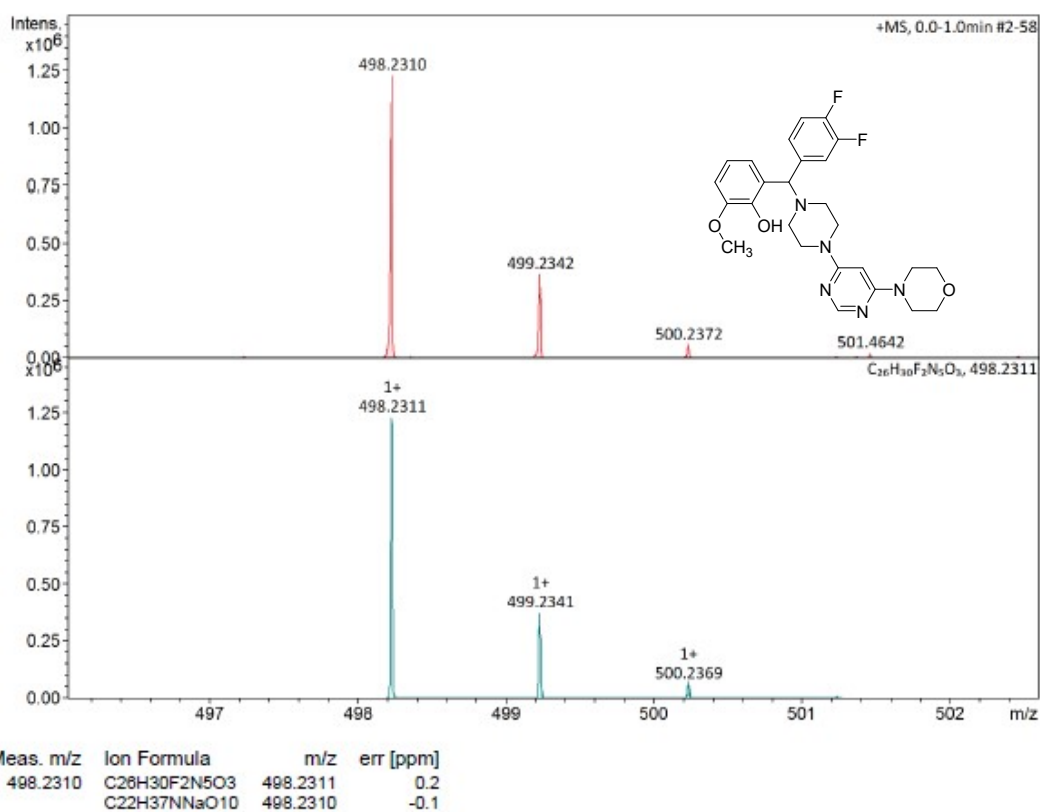

Figure 3: Elemental analysis report of 2-((3,4-difluorophenyl)(4-(6-morpholinopyrimidin-4-yl)piperazin-1-yl)methyl)-6-methoxyphenol (**V1**).

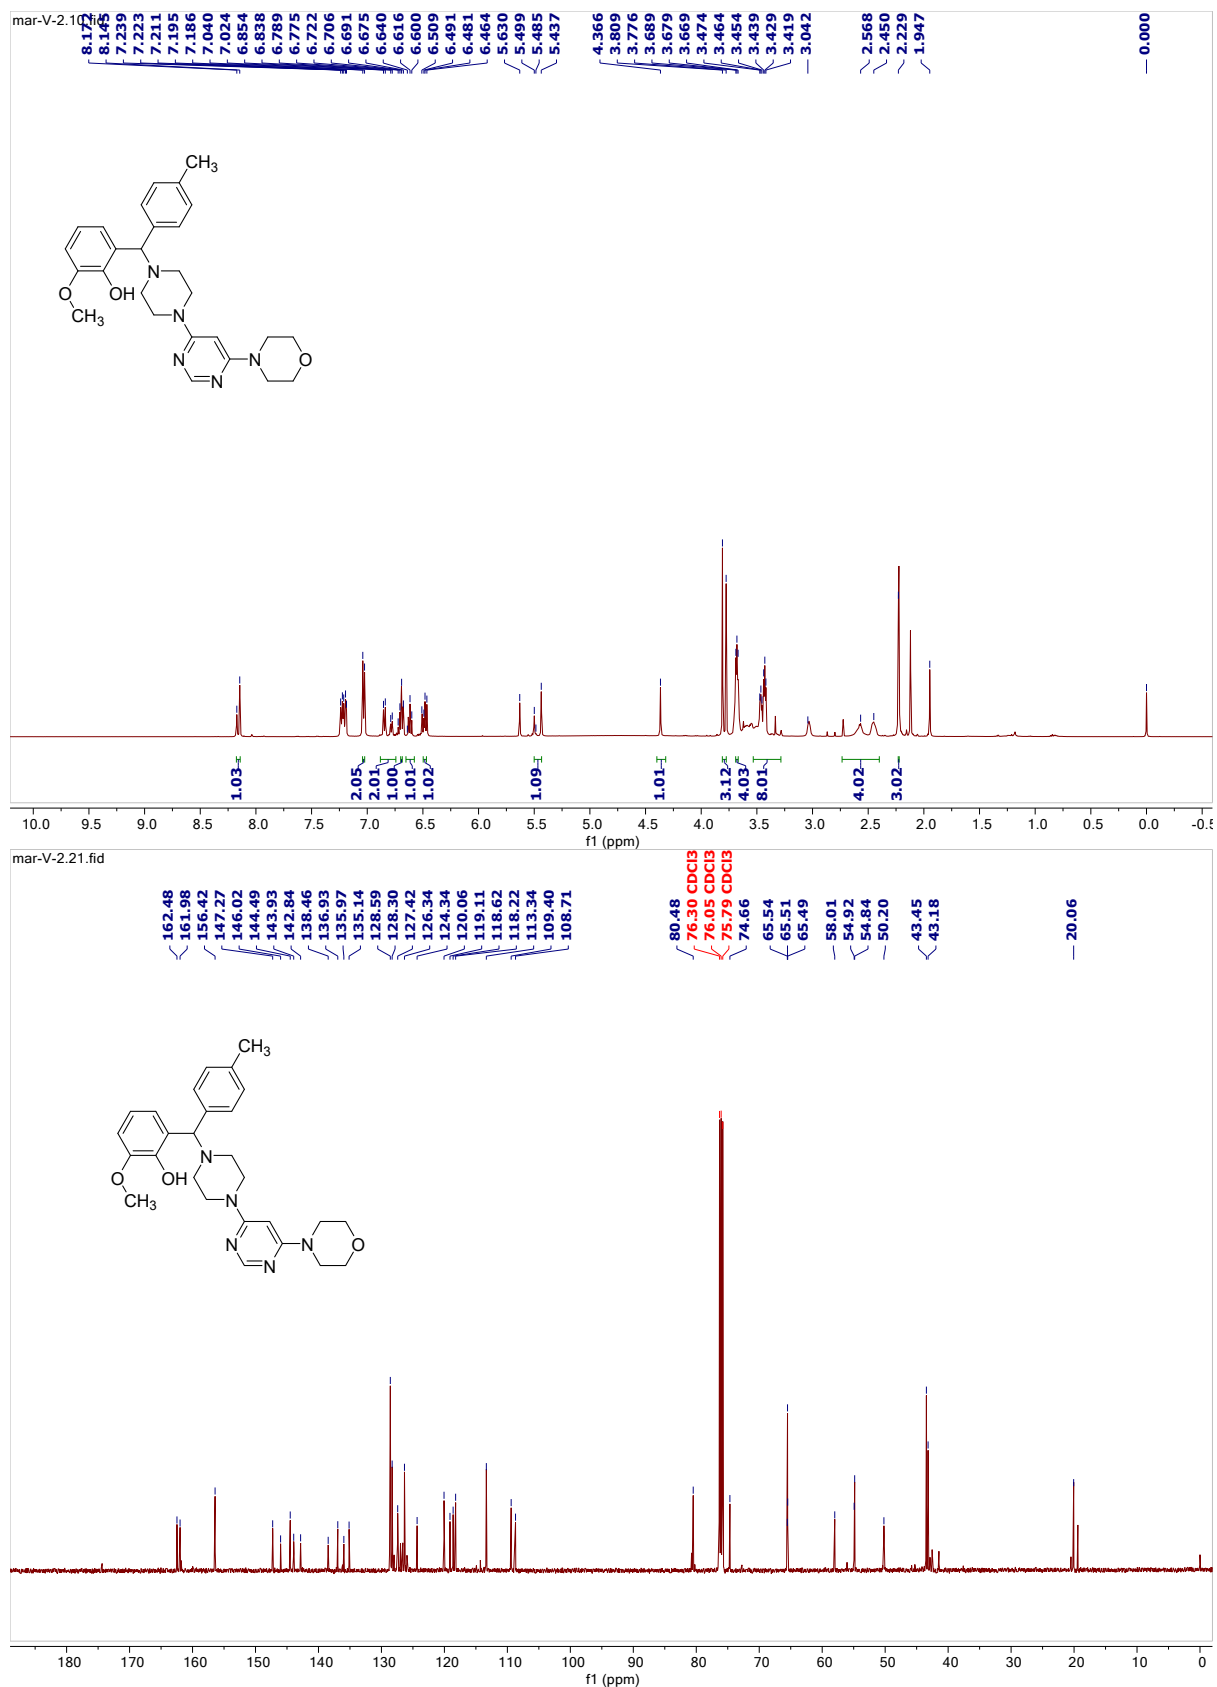

Figure 4: Top: 500 MHz <sup>1</sup>H-NMR of 2-methoxy-6-((4-(6-morpholinopyrimidin-4-yl)piperazin-1-yl)(p-tolyl)methyl)phenol (V2). Bottom: 126 MHz <sup>13</sup>C-NMR of 2-methoxy-6-((4-(6-morpholinopyrimidin-4-yl)piperazin-1-yl)(p-tolyl)methyl)phenol (V2).

## Mass Spectrum List Report

### Analysis Info

Analysis Name D:\Data\maxis2022\18933.d  
 Method ESI\_pos\_50\_1500\_os.m  
 Sample Name V1  
 Comment

Acquisition Date 17-Jun-22 1:39:52 PM

Operator Erlend  
 Instrument maxis II ETD 1823391.22318

### Acquisition Parameter

|             |            |                      |        |                  |           |
|-------------|------------|----------------------|--------|------------------|-----------|
| Source Type | ESI        | Set Capillary        | 3500 V | Set Nebulizer    | 0.3 Bar   |
| Focus       | Not active | Set End Plate Offset | -500 V | Set Dry Heater   | 200 °C    |
| Scan Begin  | 50 m/z     | Set Charging Voltage | 2000 V | Set Dry Gas      | 4.0 l/min |
| Scan End    | 1500 m/z   | Set Corona           | 0 nA   | Set Divert Valve | Waste     |
|             |            |                      |        | Set APCI Heater  | 0 °C      |

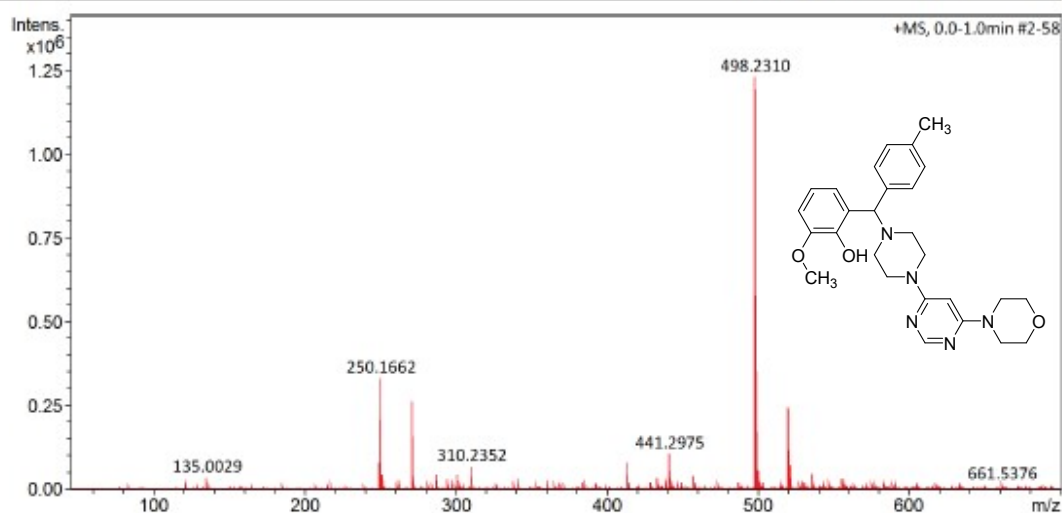

| #  | m/z      | Res.  | S/N     | I       | I %   | FWHM   |
|----|----------|-------|---------|---------|-------|--------|
| 1  | 135.0029 | 28219 | 1928.1  | 35818   | 2.9   | 0.0048 |
| 2  | 249.0722 | 34409 | 2579.9  | 81328   | 6.6   | 0.0072 |
| 3  | 250.1662 | 32522 | 10470.7 | 331804  | 27.0  | 0.0077 |
| 4  | 251.1692 | 30177 | 1433.0  | 45906   | 3.7   | 0.0083 |
| 5  | 262.1662 | 34818 | 741.4   | 26785   | 2.2   | 0.0075 |
| 6  | 271.0541 | 33949 | 6609.1  | 263892  | 21.5  | 0.0080 |
| 7  | 272.0575 | 33580 | 998.4   | 40073   | 3.3   | 0.0081 |
| 8  | 281.2451 | 35037 | 569.4   | 24681   | 2.0   | 0.0080 |
| 9  | 287.0280 | 35106 | 974.2   | 44229   | 3.6   | 0.0082 |
| 10 | 294.1924 | 35205 | 646.6   | 31019   | 2.5   | 0.0084 |
| 11 | 297.2400 | 36390 | 546.0   | 26779   | 2.2   | 0.0082 |
| 12 | 301.1411 | 36368 | 864.8   | 43066   | 3.5   | 0.0083 |
| 13 | 310.2352 | 35381 | 1254.1  | 67926   | 5.5   | 0.0088 |
| 14 | 338.2666 | 36363 | 362.7   | 23834   | 1.9   | 0.0093 |
| 15 | 341.2662 | 36969 | 457.5   | 30329   | 2.5   | 0.0092 |
| 16 | 360.3237 | 36506 | 387.7   | 28551   | 2.3   | 0.0099 |
| 17 | 385.2925 | 37824 | 326.2   | 26896   | 2.2   | 0.0102 |
| 18 | 413.2662 | 38031 | 869.7   | 81959   | 6.7   | 0.0109 |
| 19 | 433.3804 | 38580 | 347.9   | 34467   | 2.8   | 0.0112 |
| 20 | 441.2975 | 38763 | 1053.4  | 105884  | 8.6   | 0.0114 |
| 21 | 442.3010 | 38659 | 295.0   | 29744   | 2.4   | 0.0114 |
| 22 | 457.2733 | 31870 | 402.6   | 42004   | 3.4   | 0.0143 |
| 23 | 498.2310 | 39276 | 10836.8 | 1229668 | 100.0 | 0.0127 |
| 24 | 499.2342 | 38183 | 3210.9  | 365076  | 29.7  | 0.0131 |
| 25 | 500.2372 | 36840 | 512.7   | 58403   | 4.7   | 0.0136 |
| 26 | 520.2131 | 40227 | 2099.6  | 247010  | 20.1  | 0.0129 |
| 27 | 521.2163 | 38889 | 618.3   | 72836   | 5.9   | 0.0134 |
| 28 | 529.4954 | 39647 | 216.8   | 25925   | 2.1   | 0.0134 |
| 29 | 536.1871 | 40476 | 387.4   | 47189   | 3.8   | 0.0132 |
| 30 | 555.5112 | 39801 | 242.6   | 30356   | 2.5   | 0.0140 |

18933.d

Bruker Compass DataAnalysis 4.3

printed: 17-Jun-22 1:46:06 PM

by: Erlend

Page 1 of 1

Figure 5: HRMS report of 2-methoxy-6-((4-(6-morpholinopyrimidin-4-yl)piperazin-1-yl)(p-tolyl)methyl)phenol (V2).

# Elemental Analysis Report

**Analysis Info**

Sample Name V1  
 Method ESI\_pos\_50\_1500\_os.m

Acquisition Date 17-Jun-22 1:39:52 PM  
 Analysis Name D:\Data\maxis2022\18933.d

**Acquisition Parameter**

|             |            |                      |        |                  |           |
|-------------|------------|----------------------|--------|------------------|-----------|
| Source Type | ESI        | Set Capillary        | 3500 V | Set Nebulizer    | 0.3 Bar   |
| Focus       | Not active | Set End Plate Offset | -500 V | Set Dry Heater   | 200 °C    |
| Scan Begin  | 50 m/z     | Set Charging Voltage | 2000 V | Set Dry Gas      | 4.0 l/min |
| Scan End    | 1500 m/z   | Set Corona           | 0 nA   | Set Divert Valve | Waste     |
|             |            |                      |        | Set APCI Heater  | 0 °C      |

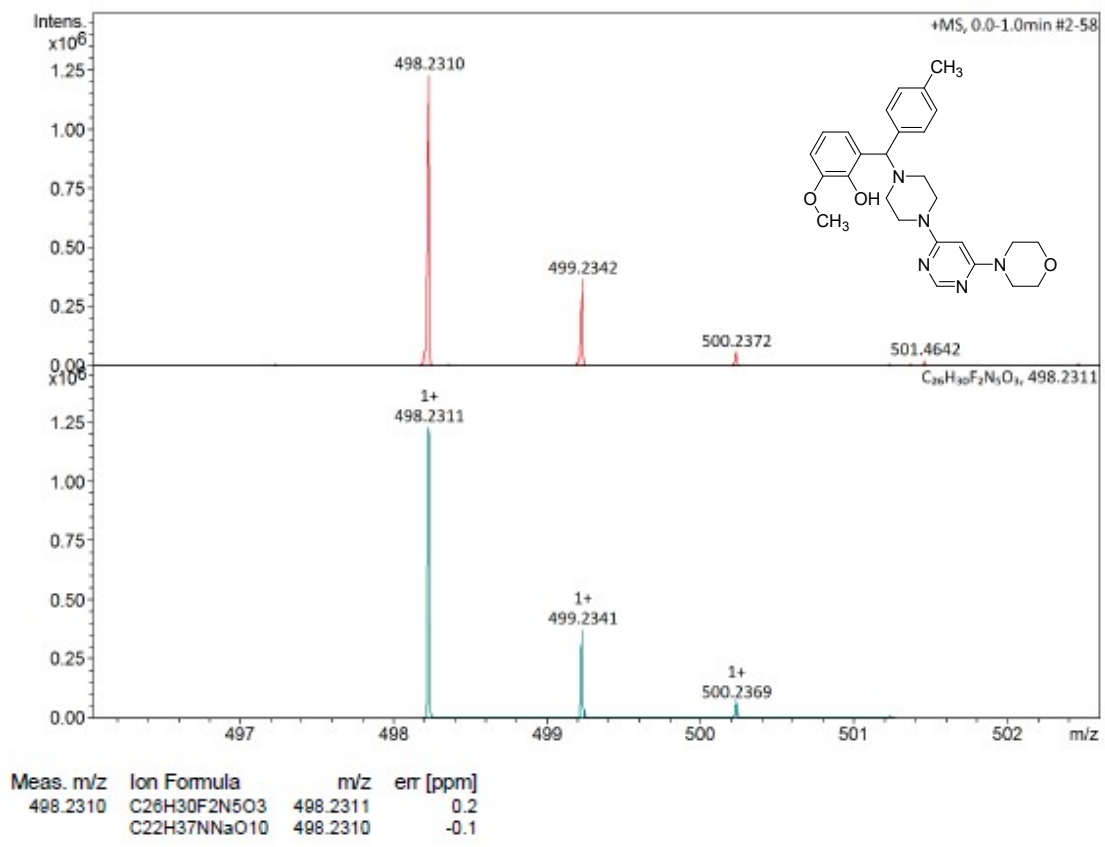

Figure 6: Elemental analysis report of 2-methoxy-6-((4-(6-morpholinopyrimidin-4-yl)piperazin-1-yl)(p-tolyl)methyl)phenol (V2).



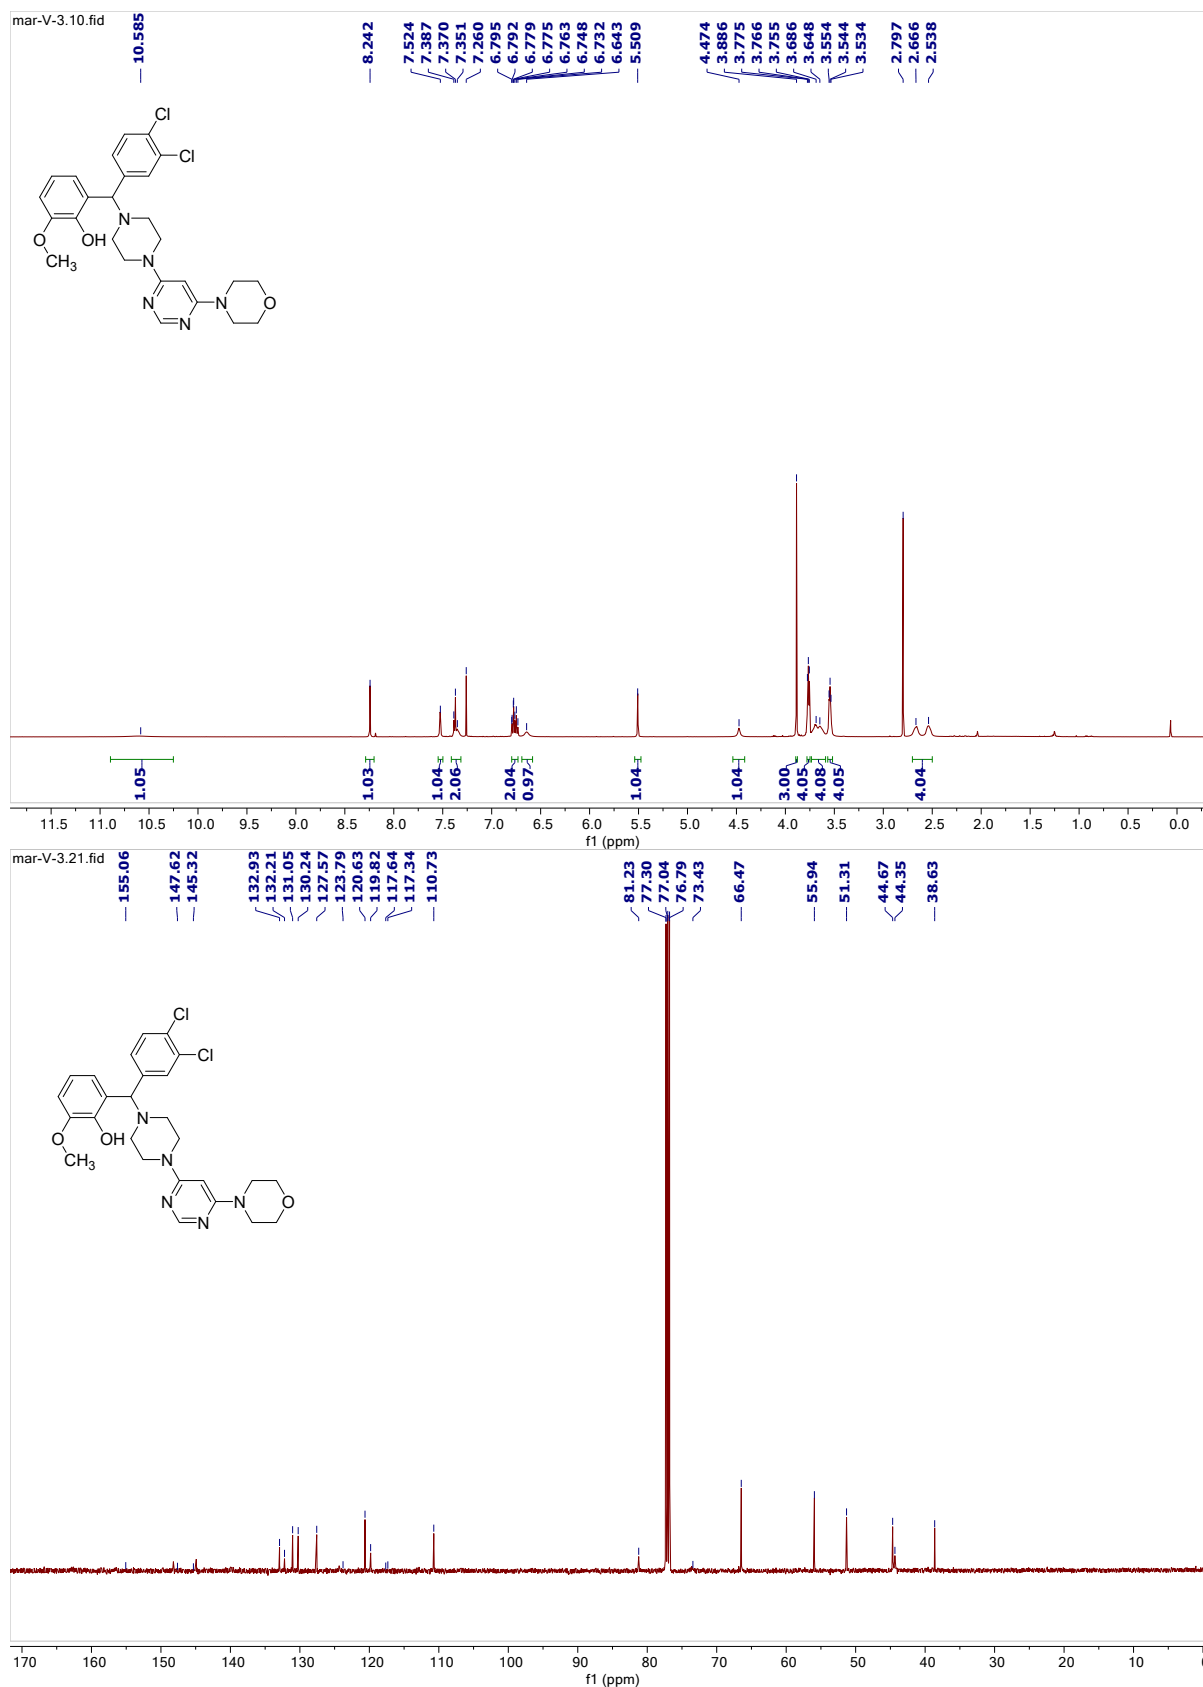

Figure 7: Top: 500 MHz <sup>1</sup>H-NMR of 2-((3,4-dichlorophenyl)(4-(6-morpholinopyrimidin-4-yl)piperazin-1-yl)methyl)-6-methoxyphenol (**V3**). Bottom: 126 MHz <sup>13</sup>C-NMR of 2-((3,4-dichlorophenyl)(4-(6-morpholinopyrimidin-4-yl)piperazin-1-yl)methyl)-6-methoxyphenol (**V3**).

## Mass Spectrum List Report

### Analysis Info

Analysis Name D:\Data\maxis2022\18936.d  
 Method ESI\_pos\_50\_1500\_os.m  
 Sample Name V3  
 Comment

Acquisition Date 17-Jun-22 2:36:06 PM

Operator Erlend  
 Instrument maxis II ETD 1823391.22318

### Acquisition Parameter

|             |            |                      |        |                  |           |
|-------------|------------|----------------------|--------|------------------|-----------|
| Source Type | ESI        | Set Capillary        | 3500 V | Set Nebulizer    | 2.0 Bar   |
| Focus       | Not active | Set End Plate Offset | -500 V | Set Dry Heater   | 200 °C    |
| Scan Begin  | 50 m/z     | Set Charging Voltage | 2000 V | Set Dry Gas      | 4.0 l/min |
| Scan End    | 1500 m/z   | Set Corona           | 0 nA   | Set Divert Valve | Waste     |
|             |            |                      |        | Set APCI Heater  | 0 °C      |

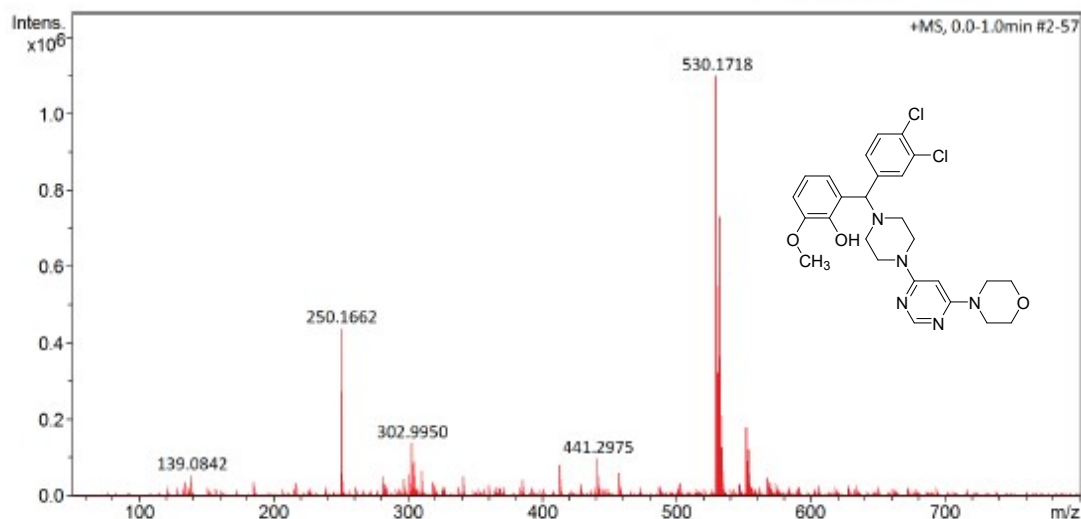

| #  | m/z      | Res.  | S/N     | I       | I %   | FWHM   |
|----|----------|-------|---------|---------|-------|--------|
| 1  | 135.0029 | 26523 | 2043.6  | 36172   | 3.3   | 0.0051 |
| 2  | 139.0842 | 27189 | 2993.3  | 53163   | 4.8   | 0.0051 |
| 3  | 185.1149 | 31218 | 1804.7  | 37791   | 3.4   | 0.0059 |
| 4  | 250.1662 | 33811 | 13498.1 | 438722  | 39.9  | 0.0074 |
| 5  | 251.1692 | 30228 | 1779.3  | 58705   | 5.3   | 0.0083 |
| 6  | 281.0131 | 35031 | 1122.8  | 50921   | 4.6   | 0.0080 |
| 7  | 297.2400 | 35049 | 823.7   | 44091   | 4.0   | 0.0085 |
| 8  | 301.1411 | 34817 | 1068.3  | 58165   | 5.3   | 0.0086 |
| 9  | 302.9950 | 35236 | 2492.7  | 138456  | 12.6  | 0.0086 |
| 10 | 304.9921 | 35248 | 1546.3  | 88522   | 8.1   | 0.0087 |
| 11 | 310.2353 | 36198 | 1101.2  | 66119   | 6.0   | 0.0086 |
| 12 | 318.9690 | 35765 | 584.3   | 36999   | 3.4   | 0.0089 |
| 13 | 341.2663 | 37134 | 697.7   | 52217   | 4.7   | 0.0092 |
| 14 | 385.2924 | 37047 | 450.4   | 41989   | 3.8   | 0.0104 |
| 15 | 413.2662 | 37553 | 759.1   | 81997   | 7.5   | 0.0110 |
| 16 | 441.2975 | 38121 | 805.4   | 97126   | 8.8   | 0.0116 |
| 17 | 457.2738 | 30932 | 481.5   | 59838   | 5.4   | 0.0148 |
| 18 | 503.2051 | 39580 | 253.7   | 34407   | 3.1   | 0.0127 |
| 19 | 530.1718 | 39136 | 7641.5  | 1099316 | 100.0 | 0.0135 |
| 20 | 531.1750 | 37758 | 2247.4  | 324290  | 29.5  | 0.0141 |
| 21 | 532.1691 | 38191 | 5041.5  | 729743  | 66.4  | 0.0139 |
| 22 | 533.1721 | 38191 | 1475.3  | 213708  | 19.4  | 0.0140 |
| 23 | 534.1671 | 34178 | 879.3   | 127478  | 11.6  | 0.0156 |
| 24 | 535.1696 | 36391 | 249.9   | 36286   | 3.3   | 0.0147 |
| 25 | 552.1538 | 40153 | 1217.3  | 181576  | 16.5  | 0.0138 |
| 26 | 553.1570 | 39282 | 367.6   | 54899   | 5.0   | 0.0141 |
| 27 | 554.1512 | 38850 | 807.1   | 120883  | 11.0  | 0.0143 |
| 28 | 555.1542 | 37787 | 229.3   | 34468   | 3.1   | 0.0147 |
| 29 | 568.1278 | 40951 | 323.8   | 49649   | 4.5   | 0.0139 |
| 30 | 570.1252 | 38675 | 234.7   | 36034   | 3.3   | 0.0147 |

18936.d

Bruker Compass DataAnalysis 4.3

printed: 17-Jun-22 2:43:49 PM

by: Erlend

Page 1 of 1

Figure 8: HRMS report of 2-((3,4-dichlorophenyl)(4-(6-morpholinopyrimidin-4-yl)piperazin-1-yl)methyl)-6-methoxyphenol (**V3**).

## Elemental Analysis Report

### Analysis Info

Sample Name V3  
Method ESI\_pos\_50\_1500\_os.m

Acquisition Date 17-Jun-22 2:36:06 PM  
Analysis Name D:\Data\maxis2022\18936.d

### Acquisition Parameter

|             |            |                      |        |                  |           |
|-------------|------------|----------------------|--------|------------------|-----------|
| Source Type | ESI        | Set Capillary        | 3500 V | Set Nebulizer    | 2.0 Bar   |
| Focus       | Not active | Set End Plate Offset | -500 V | Set Dry Heater   | 200 °C    |
| Scan Begin  | 50 m/z     | Set Charging Voltage | 2000 V | Set Dry Gas      | 4.0 l/min |
| Scan End    | 1500 m/z   | Set Corona           | 0 nA   | Set Divert Valve | Waste     |
|             |            |                      |        | Set APCI Heater  | 0 °C      |

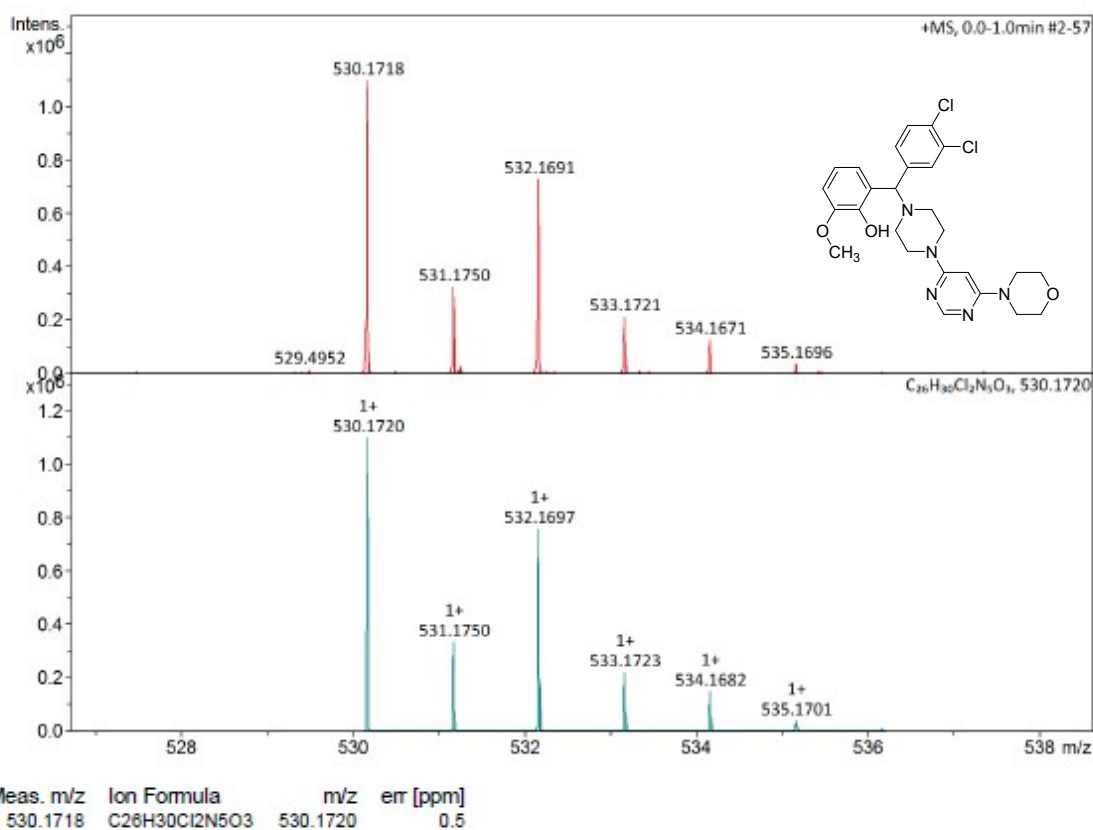

Figure 9: Elemental analysis report of 2-((3,4-dichlorophenyl)(4-(6-morpholinopyrimidin-4-yl)piperazin-1-yl)methyl)-6-methoxyphenol (V3).

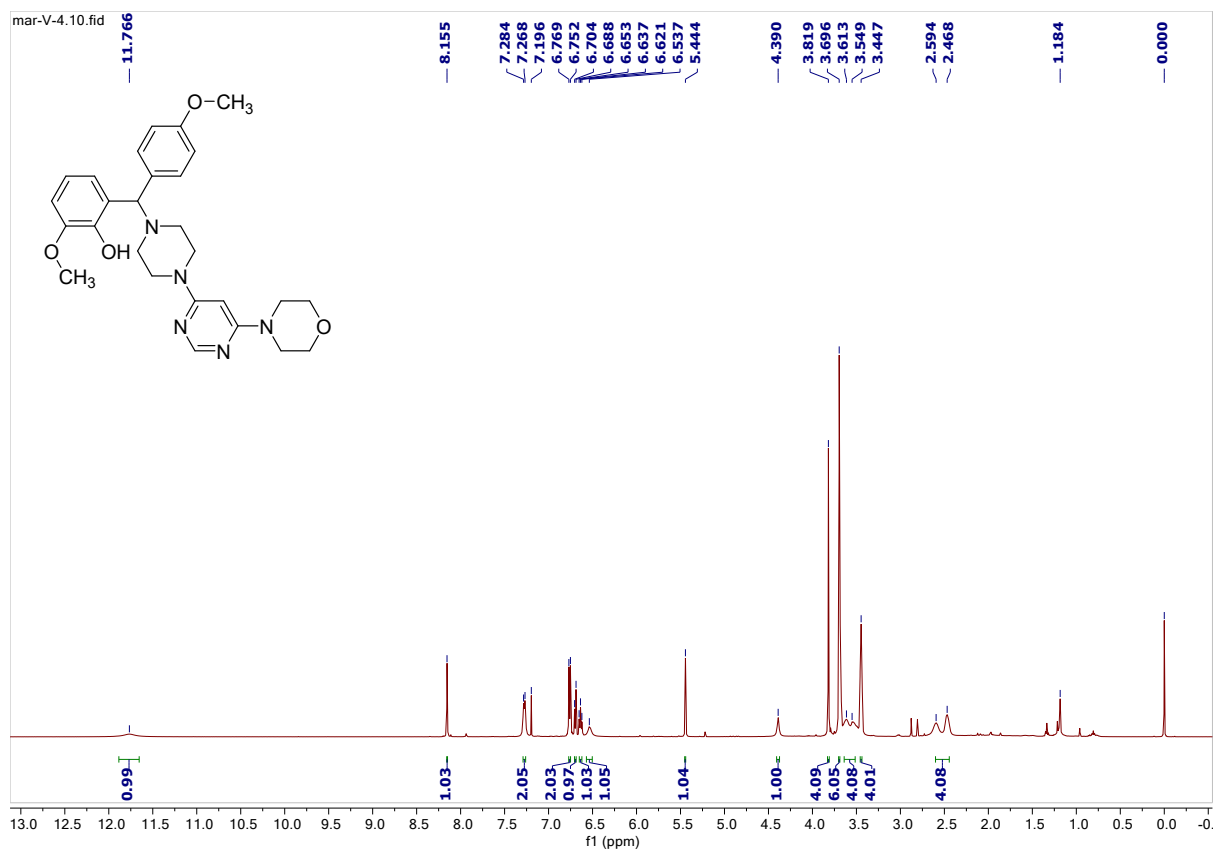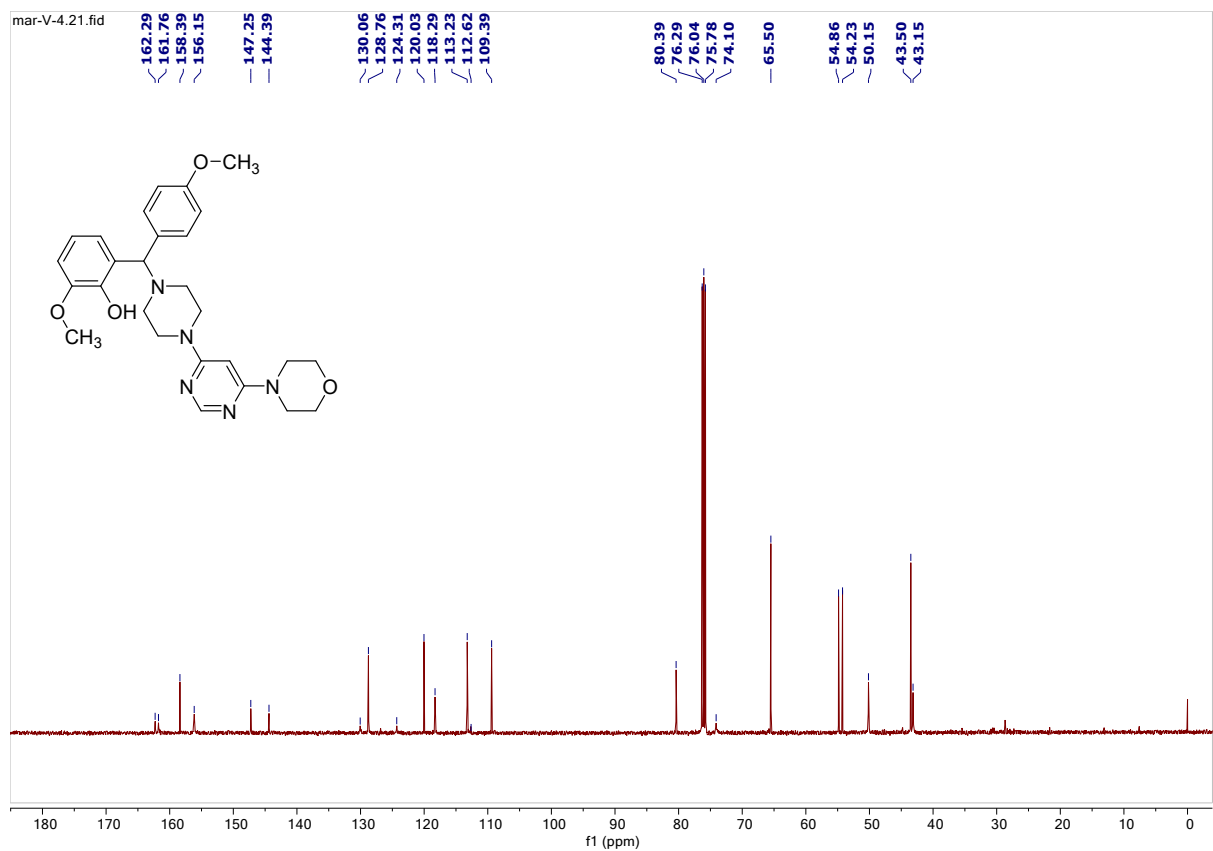

Figure 10: Top: 500 MHz  $^1\text{H-NMR}$  of 2-methoxy-6-((4-methoxyphenyl)(4-(6-morpholinopyrimidin-4-yl)piperazin-1-yl)methyl)phenol (**V4**). Bottom: 126 MHz  $^{13}\text{C-NMR}$  of 2-methoxy-6-((4-methoxyphenyl)(4-(6-morpholinopyrimidin-4-yl)piperazin-1-yl)methyl)phenol (**V4**).

## Mass Spectrum List Report

### Analysis Info

Analysis Name D:\Data\maxis2022\18937.d  
 Method ESI\_pos\_50\_1500\_os.m  
 Sample Name V4  
 Comment

Acquisition Date 17-Jun-22 2:58:43 PM

Operator Erlend  
 Instrument maXis II ETD 1823391.22318

### Acquisition Parameter

|             |            |                      |        |                  |           |
|-------------|------------|----------------------|--------|------------------|-----------|
| Source Type | ESI        | Set Capillary        | 3500 V | Set Nebulizer    | 0.3 Bar   |
| Focus       | Not active | Set End Plate Offset | -500 V | Set Dry Heater   | 200 °C    |
| Scan Begin  | 50 m/z     | Set Charging Voltage | 2000 V | Set Dry Gas      | 4.0 l/min |
| Scan End    | 1500 m/z   | Set Corona           | 0 nA   | Set Divert Valve | Waste     |
|             |            |                      |        | Set APCI Heater  | 0 °C      |

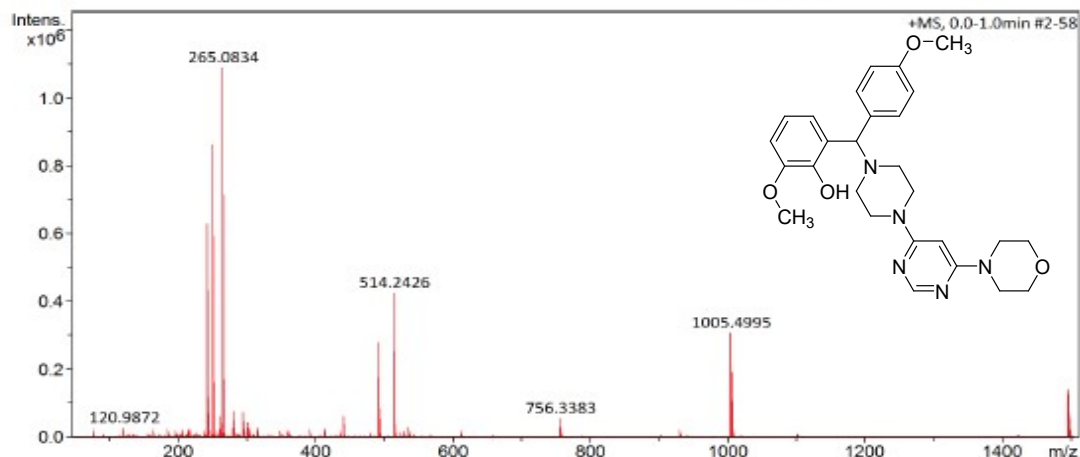

| #  | m/z       | Res.  | S/N     | I       | I %   | FWHM   |
|----|-----------|-------|---------|---------|-------|--------|
| 1  | 120.9872  | 27222 | 1902.1  | 28395   | 2.6   | 0.0044 |
| 2  | 217.1047  | 33029 | 1182.0  | 25530   | 2.3   | 0.0066 |
| 3  | 243.1015  | 32689 | 25266.9 | 630251  | 57.9  | 0.0074 |
| 4  | 244.1050  | 32597 | 4104.5  | 103056  | 9.5   | 0.0075 |
| 5  | 250.1662  | 34123 | 33289.5 | 861329  | 79.1  | 0.0073 |
| 6  | 251.1692  | 30623 | 4347.8  | 113359  | 10.4  | 0.0082 |
| 7  | 261.1309  | 34830 | 858.2   | 23835   | 2.2   | 0.0075 |
| 8  | 262.1662  | 33202 | 2282.3  | 63858   | 5.9   | 0.0079 |
| 9  | 265.0834  | 34263 | 38044.3 | 1089037 | 100.0 | 0.0077 |
| 10 | 266.0869  | 33802 | 6103.9  | 175171  | 16.1  | 0.0079 |
| 11 | 281.0574  | 35186 | 870.8   | 27445   | 2.5   | 0.0080 |
| 12 | 281.2450  | 35517 | 2455.7  | 77409   | 7.1   | 0.0079 |
| 13 | 294.1924  | 35616 | 2211.4  | 73672   | 6.8   | 0.0083 |
| 14 | 301.1410  | 35742 | 1306.6  | 44590   | 4.1   | 0.0084 |
| 15 | 316.1744  | 35529 | 756.5   | 27979   | 2.6   | 0.0089 |
| 16 | 413.2662  | 38366 | 395.0   | 23790   | 2.2   | 0.0108 |
| 17 | 441.2975  | 38714 | 957.9   | 63533   | 5.8   | 0.0114 |
| 18 | 492.2606  | 39230 | 3451.1  | 280126  | 25.7  | 0.0125 |
| 19 | 493.2638  | 37822 | 1040.3  | 84700   | 7.8   | 0.0130 |
| 20 | 514.2426  | 39461 | 4926.9  | 426123  | 39.1  | 0.0130 |
| 21 | 515.2458  | 38719 | 1489.6  | 129316  | 11.9  | 0.0133 |
| 22 | 536.2246  | 40075 | 341.7   | 31003   | 2.8   | 0.0134 |
| 23 | 756.3383  | 41442 | 676.7   | 56393   | 5.2   | 0.0183 |
| 24 | 757.3414  | 41911 | 330.7   | 27497   | 2.5   | 0.0181 |
| 25 | 1005.4995 | 43585 | 7813.7  | 309401  | 28.4  | 0.0231 |
| 26 | 1006.5027 | 43150 | 4854.5  | 192067  | 17.6  | 0.0233 |
| 27 | 1007.5057 | 41325 | 1570.8  | 62098   | 5.7   | 0.0244 |
| 28 | 1496.7612 | 44636 | 4351.8  | 140487  | 12.9  | 0.0335 |
| 29 | 1497.7642 | 44271 | 4133.6  | 133443  | 12.3  | 0.0338 |
| 30 | 1498.7674 | 44144 | 2022.3  | 65284   | 6.0   | 0.0340 |

18937.d

Figure 11: HRMS report of 2-methoxy-6-((4-methoxyphenyl)(4-(6-morpholinopyrimidin-4-yl)piperazin-1-yl)methyl)phenol (V4).

# Elemental Analysis Report

## Analysis Info

Sample Name V4  
Method ESI\_pos\_50\_1500\_os.m

Acquisition Date 17-Jun-22 2:58:43 PM  
Analysis Name D:\Data\maxis2022\18937.d

## Acquisition Parameter

|             |            |                      |        |                  |           |
|-------------|------------|----------------------|--------|------------------|-----------|
| Source Type | ESI        | Set Capillary        | 3500 V | Set Nebulizer    | 0.3 Bar   |
| Focus       | Not active | Set End Plate Offset | -500 V | Set Dry Heater   | 200 °C    |
| Scan Begin  | 50 m/z     | Set Charging Voltage | 2000 V | Set Dry Gas      | 4.0 l/min |
| Scan End    | 1500 m/z   | Set Corona           | 0 nA   | Set Divert Valve | Waste     |
|             |            |                      |        | Set APCI Heater  | 0 °C      |

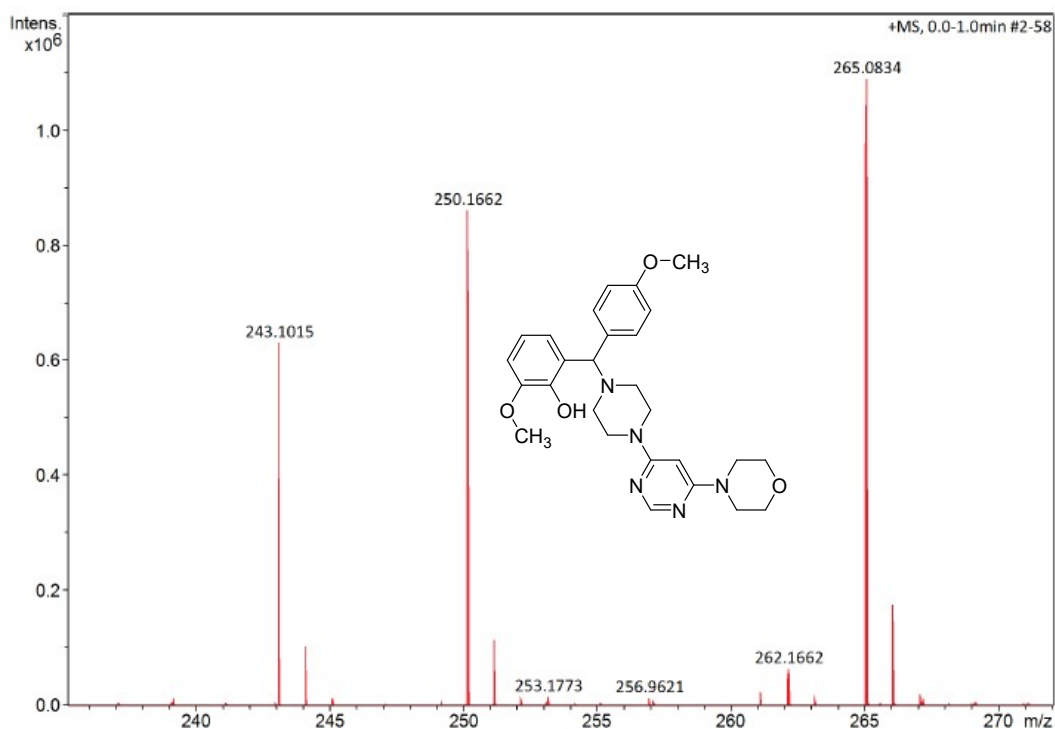

| Meas. m/z | Ion Formula                                      | m/z      | err [ppm] |
|-----------|--------------------------------------------------|----------|-----------|
| 243.1015  | C <sub>15</sub> H <sub>15</sub> O <sub>3</sub>   | 243.1016 | 0.2       |
| 250.1662  | C <sub>12</sub> H <sub>20</sub> N <sub>5</sub> O | 250.1662 | 0.2       |
| 265.0834  | C <sub>13</sub> H <sub>9</sub> N <sub>6</sub> O  | 265.0832 | -0.7      |
|           | C <sub>15</sub> H <sub>14</sub> NaO <sub>3</sub> | 265.0835 | 0.4       |

Figure 12: Elemental analysis report of 2-methoxy-6-((4-methoxyphenyl)(4-(6-morpholinopyrimidin-4-yl)piperazin-1-yl)methyl)phenol (V4).

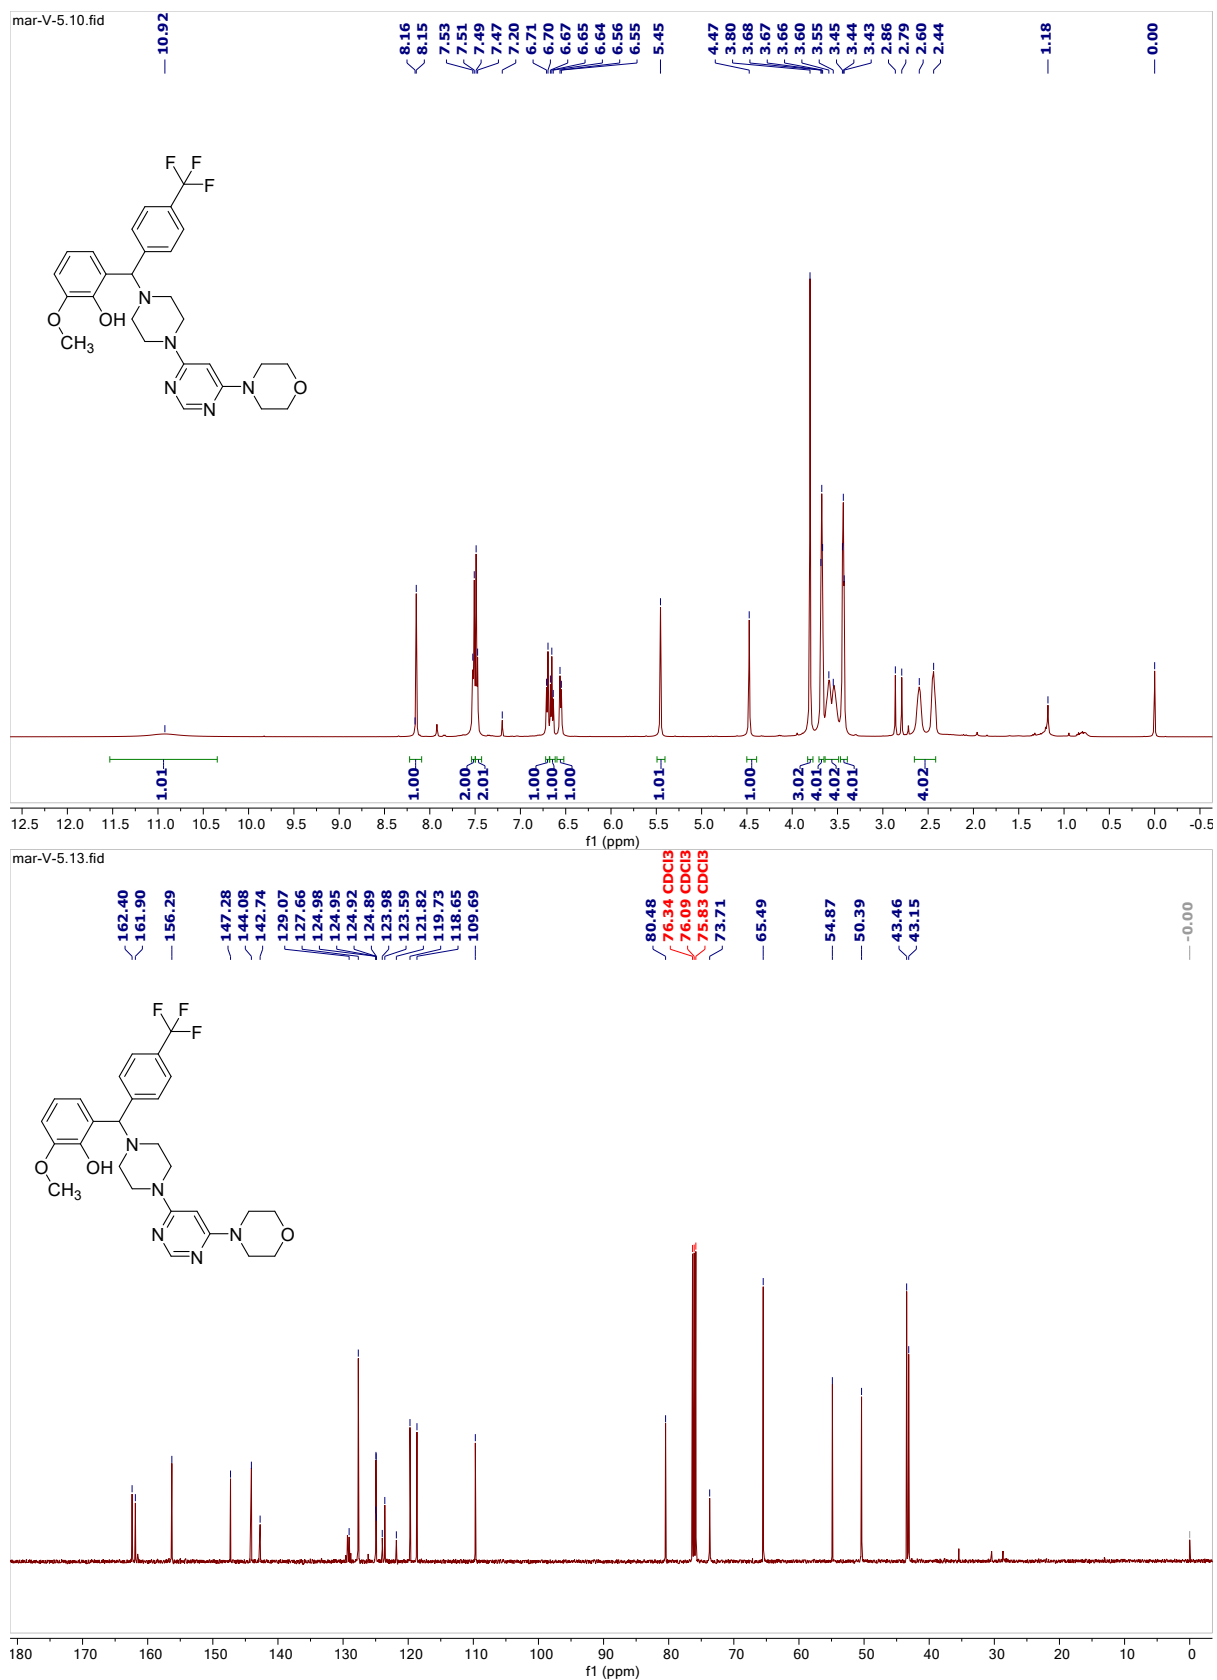

Figure 13: Top: 500 MHz <sup>1</sup>H-NMR of 2-methoxy-6-((4-(6-morpholinopyrimidin-4-yl)piperazin-1-yl)(4-(trifluoromethyl)phenyl)methyl)phenol (**V5**). Bottom: 126 MHz <sup>13</sup>C-NMR of 2-methoxy-6-((4-(6-morpholinopyrimidin-4-yl)piperazin-1-yl)(4-(trifluoromethyl)phenyl)methyl)phenol (**V5**).

# Mass Spectrum List Report

**Analysis Info**

Analysis Name D:\Data\maxis2022\18938.d  
 Method ESI\_pos\_50\_1500\_os.m  
 Sample Name V5  
 Comment

Acquisition Date 17-Jun-22 3:51:58 PM  
 Operator Erlend  
 Instrument maXis II ETD 1823391.22318

**Acquisition Parameter**

|             |            |                      |        |                  |           |
|-------------|------------|----------------------|--------|------------------|-----------|
| Source Type | ESI        | Set Capillary        | 3500 V | Set Nebulizer    | 0.3 Bar   |
| Focus       | Not active | Set End Plate Offset | -500 V | Set Dry Heater   | 200 °C    |
| Scan Begin  | 50 m/z     | Set Charging Voltage | 2000 V | Set Dry Gas      | 4.0 l/min |
| Scan End    | 1500 m/z   | Set Corona           | 0 nA   | Set Divert Valve | Waste     |
|             |            |                      |        | Set APCI Heater  | 0 °C      |

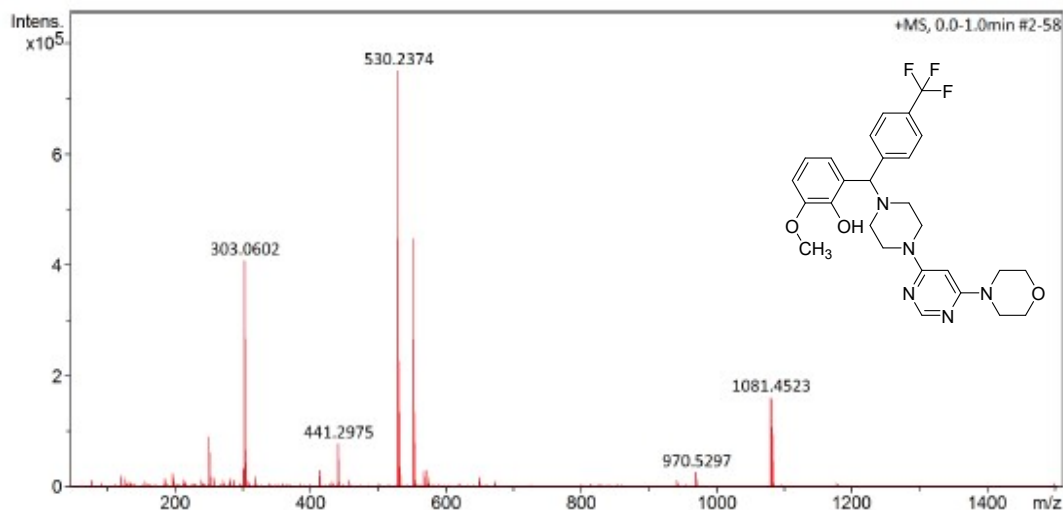

| #  | m/z       | Res.  | S/N     | I      | I%    | FWHM   |
|----|-----------|-------|---------|--------|-------|--------|
| 1  | 76.9974   | 22693 | 894.1   | 11982  | 1.6   | 0.0034 |
| 2  | 120.9872  | 27441 | 1523.5  | 20545  | 2.7   | 0.0044 |
| 3  | 185.1148  | 31582 | 1090.3  | 15693  | 2.1   | 0.0059 |
| 4  | 197.0341  | 32623 | 1620.0  | 23871  | 3.2   | 0.0060 |
| 5  | 250.1662  | 34189 | 5421.6  | 91163  | 12.1  | 0.0073 |
| 6  | 251.1691  | 29724 | 704.5   | 11907  | 1.6   | 0.0085 |
| 7  | 256.9620  | 33543 | 1017.5  | 17508  | 2.3   | 0.0077 |
| 8  | 281.0783  | 34146 | 718.7   | 14290  | 1.9   | 0.0082 |
| 9  | 286.9725  | 34395 | 636.9   | 13051  | 1.7   | 0.0083 |
| 10 | 301.1409  | 36156 | 1509.8  | 33438  | 4.5   | 0.0083 |
| 11 | 303.0602  | 35122 | 18170.8 | 408561 | 54.4  | 0.0086 |
| 12 | 304.0636  | 34988 | 2934.5  | 66441  | 8.8   | 0.0087 |
| 13 | 319.0342  | 35474 | 795.3   | 19552  | 2.6   | 0.0090 |
| 14 | 413.2662  | 39150 | 738.1   | 31590  | 4.2   | 0.0106 |
| 15 | 441.2975  | 38488 | 1541.2  | 78054  | 10.4  | 0.0115 |
| 16 | 442.3009  | 38728 | 443.4   | 22560  | 3.0   | 0.0114 |
| 17 | 530.2374  | 39536 | 11108.0 | 751284 | 100.0 | 0.0134 |
| 18 | 531.2406  | 38070 | 3362.8  | 227928 | 30.3  | 0.0140 |
| 19 | 532.2436  | 37091 | 555.0   | 37678  | 5.0   | 0.0143 |
| 20 | 552.2194  | 39086 | 6332.3  | 447619 | 59.6  | 0.0138 |
| 21 | 553.2226  | 38385 | 1921.0  | 135778 | 18.1  | 0.0144 |
| 22 | 554.2256  | 37913 | 322.1   | 22835  | 3.0   | 0.0146 |
| 23 | 568.1934  | 40399 | 397.7   | 28752  | 3.8   | 0.0141 |
| 24 | 574.2015  | 40352 | 412.3   | 29973  | 4.0   | 0.0142 |
| 25 | 650.2178  | 40978 | 228.3   | 17364  | 2.3   | 0.0159 |
| 26 | 970.5297  | 42783 | 592.0   | 26053  | 3.5   | 0.0227 |
| 27 | 971.5330  | 42207 | 354.3   | 15570  | 2.1   | 0.0230 |
| 28 | 1081.4523 | 43387 | 4117.4  | 161883 | 21.5  | 0.0249 |
| 29 | 1082.4554 | 42346 | 2503.1  | 98353  | 13.1  | 0.0256 |
| 30 | 1083.4584 | 42350 | 832.5   | 32707  | 4.4   | 0.0256 |

18938.d

Bruker Compass DataAnalysis 4.3

printed: 17-Jun-22 3:55:57 PM

by: Erlend

Page 1 of 1

Figure 14: HRMS report of 2-methoxy-6-((4-(6-morpholinopyrimidin-4-yl)piperazin-1-yl)(4-(trifluoromethyl)phenyl)methyl)phenol (V5).



## Elemental Analysis Report

### Analysis Info

Sample Name V5

Method ESI\_pos\_50\_1500\_os.m

Acquisition Date 17-Jun-22 3:51:58 PM

Analysis Name D:\Data\maxis2022\18938.d

### Acquisition Parameter

|             |            |                      |        |                  |           |
|-------------|------------|----------------------|--------|------------------|-----------|
| Source Type | ESI        | Set Capillary        | 3500 V | Set Nebulizer    | 0.3 Bar   |
| Focus       | Not active | Set End Plate Offset | -500 V | Set Dry Heater   | 200 °C    |
| Scan Begin  | 50 m/z     | Set Charging Voltage | 2000 V | Set Dry Gas      | 4.0 l/min |
| Scan End    | 1500 m/z   | Set Corona           | 0 nA   | Set Divert Valve | Waste     |
|             |            |                      |        | Set APCI Heater  | 0 °C      |

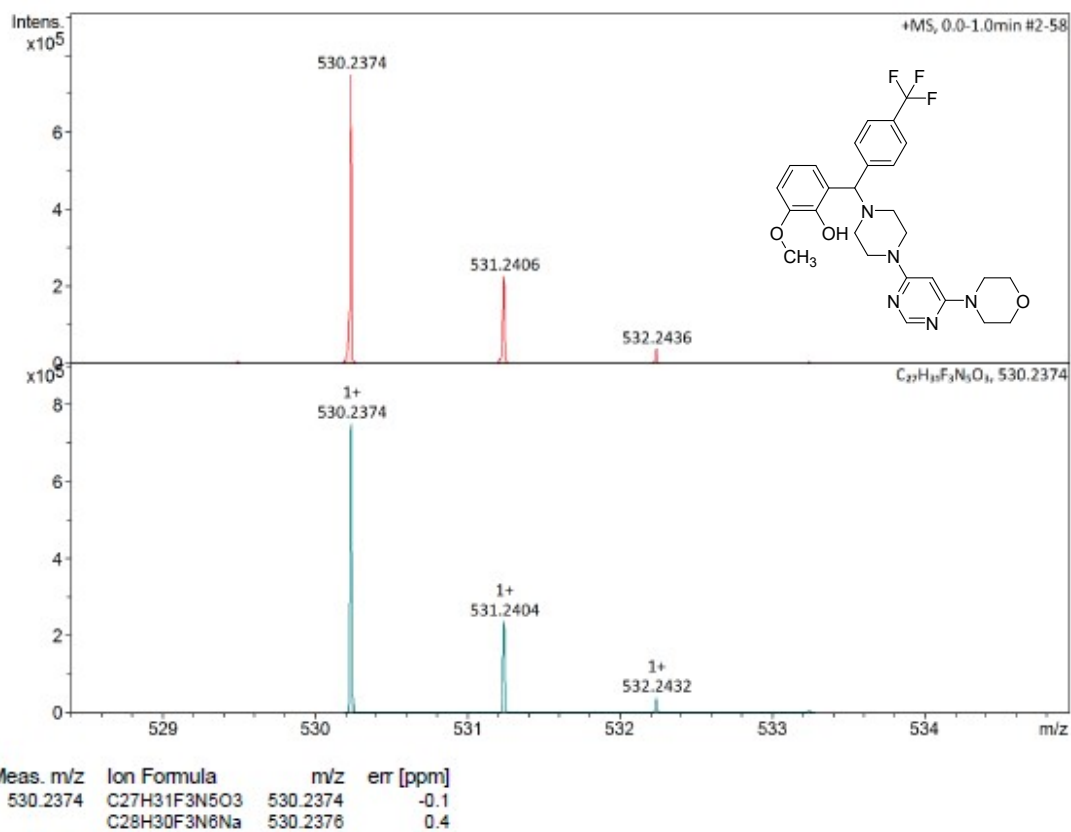

Figure 15: Elemental analysis report of 2-methoxy-6-((4-(6-morpholinopyrimidin-4-yl)piperazin-1-yl)(4-(trifluoromethyl)phenyl)methyl)phenol (V5).

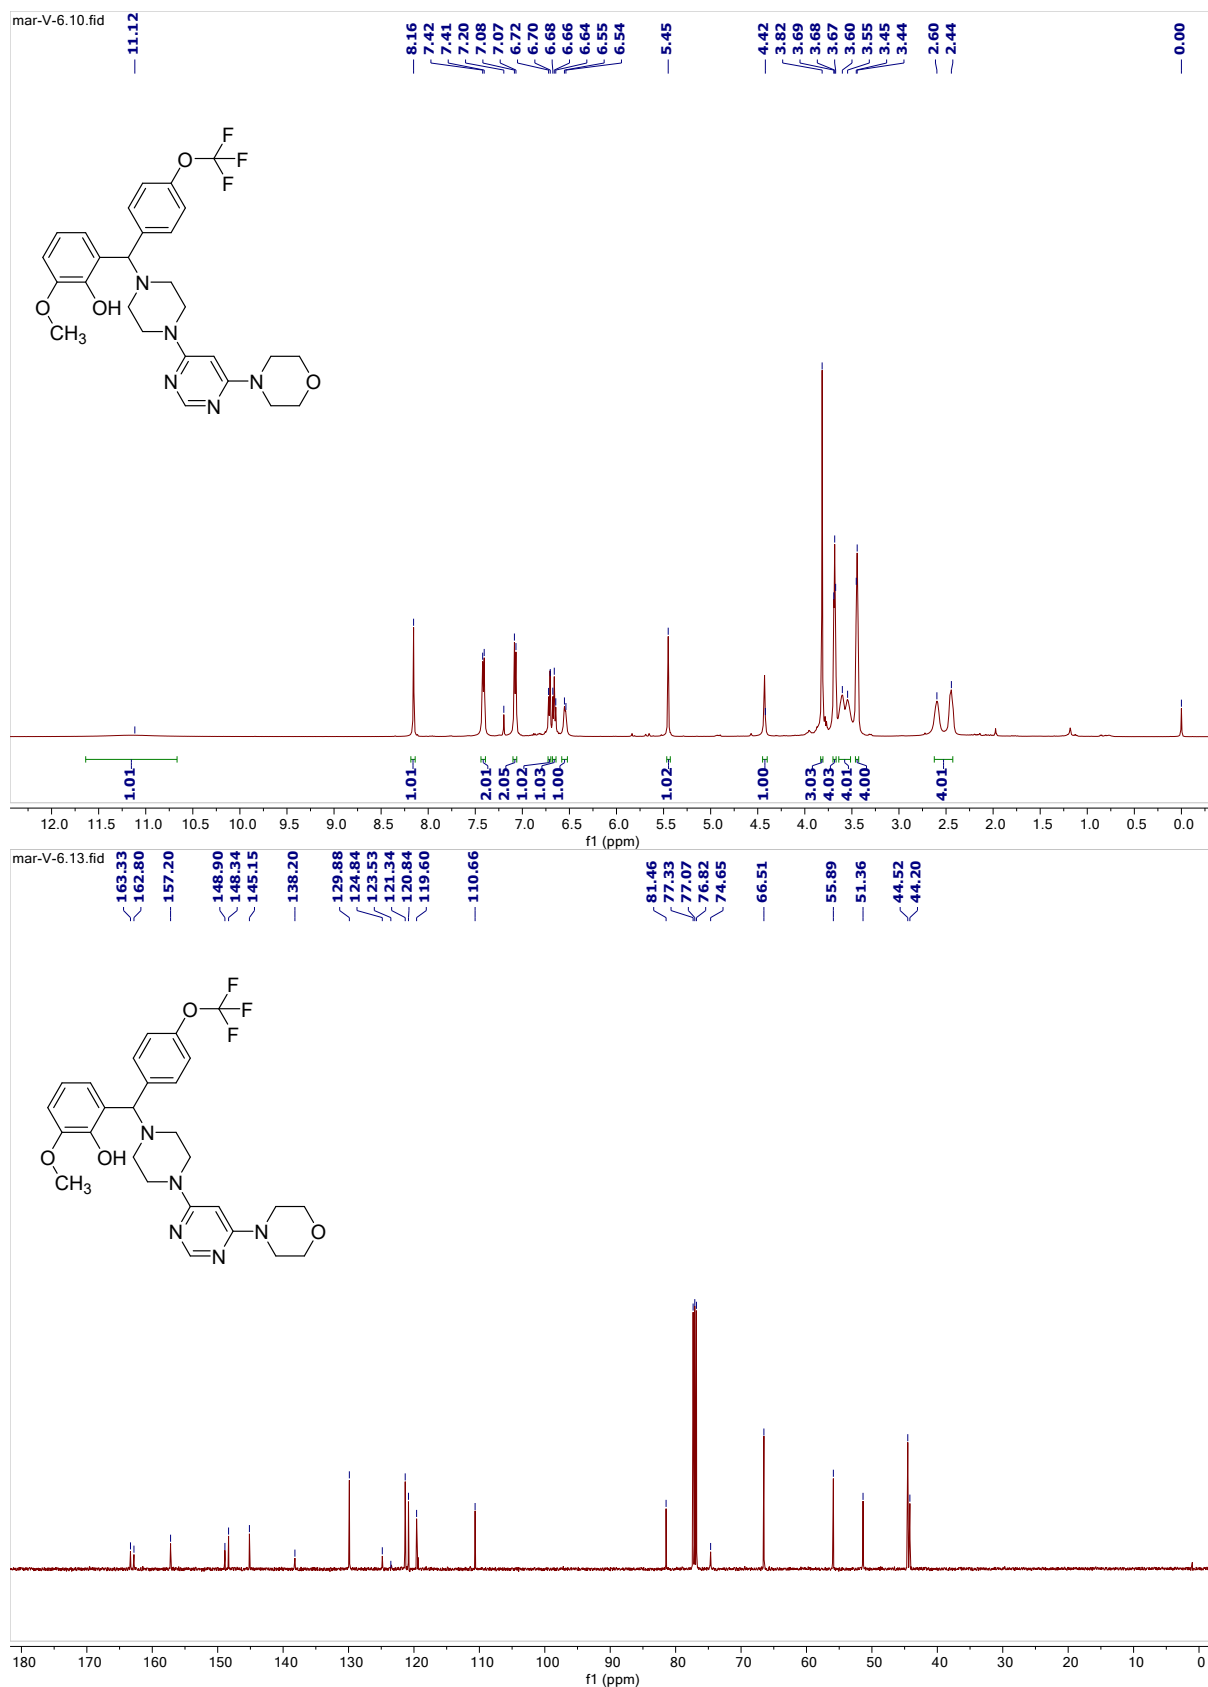

Figure 16: Top: 500 MHz <sup>1</sup>H-NMR of 2-methoxy-6-((4-(6-morpholinopyrimidin-4-yl)piperazin-1-yl)(4-(trifluoromethoxy)phenyl)methyl)phenol (**V6**). Bottom: 126 MHz <sup>13</sup>C-NMR of 2-methoxy-6-((4-(6-morpholinopyrimidin-4-yl)piperazin-1-yl)(4-(trifluoromethoxy)phenyl)methyl)phenol (**V6**).

# Mass Spectrum List Report

**Analysis Info**

Analysis Name D:\Data\maxis2022\18939.d  
 Method ESI\_pos\_50\_1500\_os.m  
 Sample Name V6  
 Comment

Acquisition Date 17-Jun-22 4:05:26 PM

Operator Erlend  
 Instrument maXis II ETD 1823391.22318

**Acquisition Parameter**

|             |            |                      |        |                  |           |
|-------------|------------|----------------------|--------|------------------|-----------|
| Source Type | ESI        | Set Capillary        | 3500 V | Set Nebulizer    | 0.3 Bar   |
| Focus       | Not active | Set End Plate Offset | -500 V | Set Dry Heater   | 200 °C    |
| Scan Begin  | 50 m/z     | Set Charging Voltage | 2000 V | Set Dry Gas      | 4.0 l/min |
| Scan End    | 1500 m/z   | Set Corona           | 0 nA   | Set Divert Valve | Waste     |
|             |            |                      |        | Set APCI Heater  | 0 °C      |

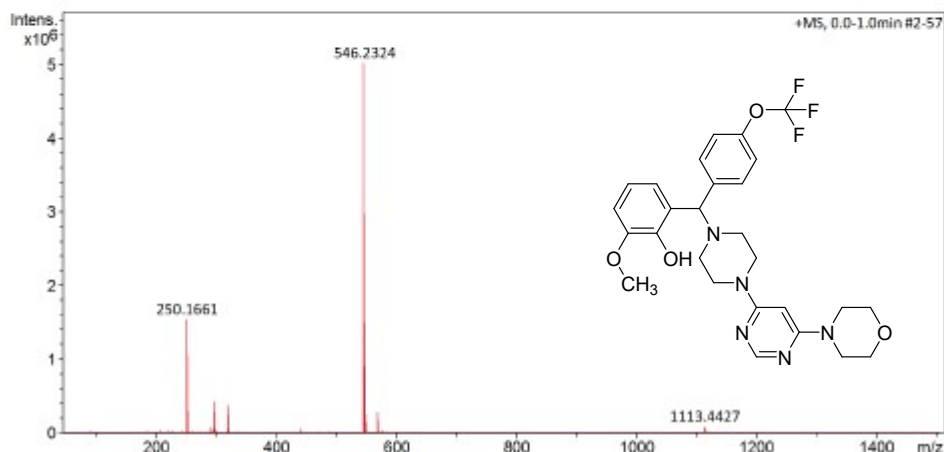

| #  | m/z       | Res.  | S/N     | I       | 1%    | FWHM   |
|----|-----------|-------|---------|---------|-------|--------|
| 1  | 207.1240  | 32605 | 1716.8  | 30005   | 0.6   | 0.0064 |
| 2  | 221.0808  | 32397 | 1692.6  | 34850   | 0.7   | 0.0068 |
| 3  | 226.9514  | 32542 | 1102.0  | 23932   | 0.5   | 0.0070 |
| 4  | 250.1661  | 34060 | 62782.8 | 1550136 | 30.9  | 0.0073 |
| 5  | 251.1692  | 30674 | 8042.8  | 200824  | 4.0   | 0.0082 |
| 6  | 261.0732  | 34605 | 736.8   | 19159   | 0.4   | 0.0075 |
| 7  | 275.0889  | 35556 | 828.9   | 24293   | 0.5   | 0.0077 |
| 8  | 281.2450  | 35565 | 726.1   | 22629   | 0.5   | 0.0079 |
| 9  | 291.0839  | 35431 | 2431.4  | 81582   | 1.6   | 0.0082 |
| 10 | 297.0732  | 34648 | 12421.7 | 435693  | 8.7   | 0.0086 |
| 11 | 298.0766  | 35855 | 2054.3  | 72282   | 1.4   | 0.0083 |
| 12 | 319.0551  | 36281 | 9500.8  | 371177  | 7.4   | 0.0088 |
| 13 | 320.0585  | 36421 | 1545.7  | 60666   | 1.2   | 0.0088 |
| 14 | 335.0291  | 36914 | 443.6   | 18551   | 0.4   | 0.0091 |
| 15 | 441.2975  | 38779 | 870.0   | 51029   | 1.0   | 0.0114 |
| 16 | 488.2505  | 39070 | 294.6   | 18965   | 0.4   | 0.0125 |
| 17 | 546.2324  | 39338 | 69295.4 | 5018806 | 100.0 | 0.0139 |
| 18 | 546.3703  | 41875 | 1333.2  | 96557   | 1.9   | 0.0130 |
| 19 | 546.4031  | 37841 | 285.0   | 20643   | 0.4   | 0.0144 |
| 20 | 546.4649  | 23324 | 933.2   | 67591   | 1.3   | 0.0234 |
| 21 | 546.7833  | 62337 | 296.9   | 21512   | 0.4   | 0.0088 |
| 22 | 547.2355  | 38530 | 20836.3 | 1509696 | 30.1  | 0.0142 |
| 23 | 548.2384  | 37322 | 3599.1  | 260834  | 5.2   | 0.0147 |
| 24 | 549.2412  | 35839 | 461.1   | 33438   | 0.7   | 0.0153 |
| 25 | 568.2145  | 39577 | 3815.1  | 279360  | 5.6   | 0.0144 |
| 26 | 569.2176  | 39670 | 1217.4  | 89193   | 1.8   | 0.0143 |
| 27 | 576.2432  | 40552 | 503.7   | 36810   | 0.7   | 0.0142 |
| 28 | 1113.4427 | 44719 | 2687.3  | 88803   | 1.8   | 0.0249 |
| 29 | 1114.4458 | 43132 | 1654.8  | 54637   | 1.1   | 0.0258 |
| 30 | 1115.4488 | 42155 | 546.8   | 18044   | 0.4   | 0.0265 |

18939.d

Bruker Compass DataAnalysis 4.3

printed: 17-Jun-22 4:11:20 PM

by: Erlend

Page 1 of 1

Figure 17: HRMS report of 2-methoxy-6-((4-(6-morpholinopyrimidin-4-yl)piperazin-1-yl)(4-(trifluoromethoxy)phenyl)methyl)phenol (V6).

# Elemental Analysis Report

**Analysis Info**

Sample Name V6  
 Method ESI\_pos\_50\_1500\_os.m

Acquisition Date 17-Jun-22 4:05:26 PM  
 Analysis Name D:\Data\maxis2022\18939.d

**Acquisition Parameter**

|             |            |                      |        |                  |           |
|-------------|------------|----------------------|--------|------------------|-----------|
| Source Type | ESI        | Set Capillary        | 3500 V | Set Nebulizer    | 0.3 Bar   |
| Focus       | Not active | Set End Plate Offset | -500 V | Set Dry Heater   | 200 °C    |
| Scan Begin  | 50 m/z     | Set Charging Voltage | 2000 V | Set Dry Gas      | 4.0 l/min |
| Scan End    | 1500 m/z   | Set Corona           | 0 nA   | Set Divert Valve | Waste     |
|             |            |                      |        | Set APCI Heater  | 0 °C      |

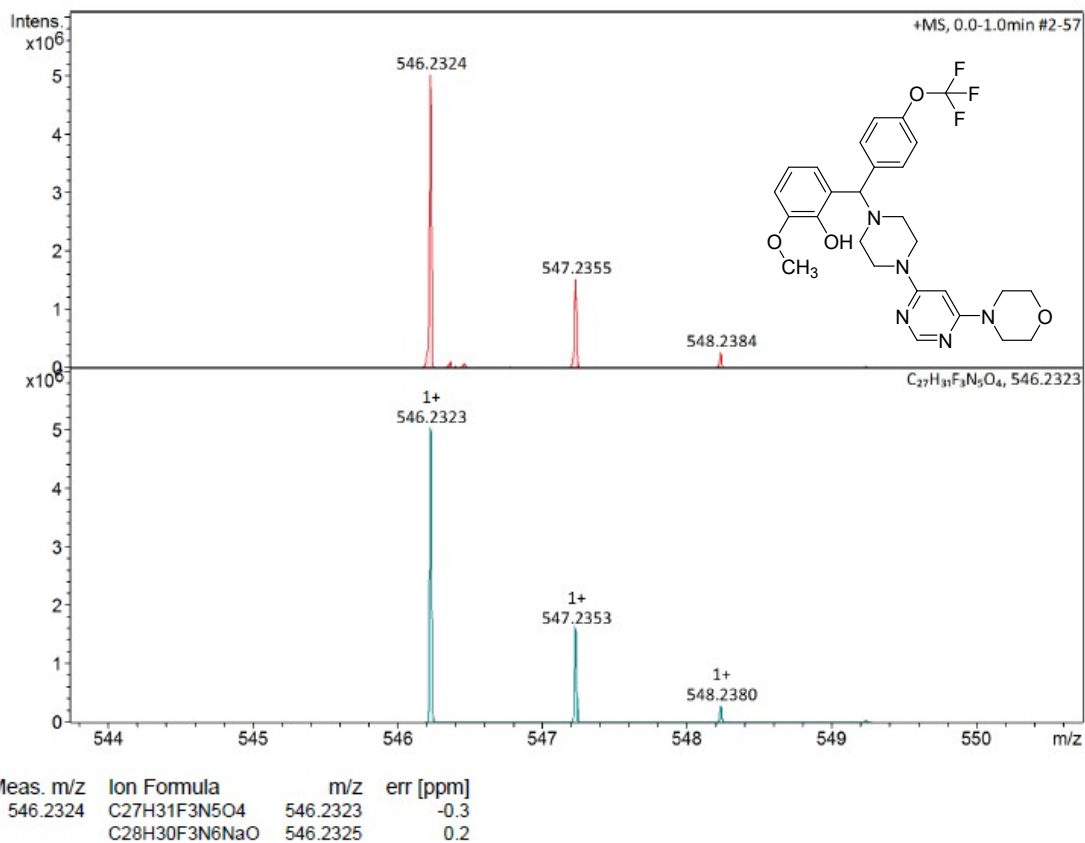

Figure 18: Elemental analysis report of 2-methoxy-6-((4-(6-morpholinopyrimidin-4-yl)piperazin-1-yl)(4-(trifluoromethoxy)phenyl)methyl)phenol (V6).

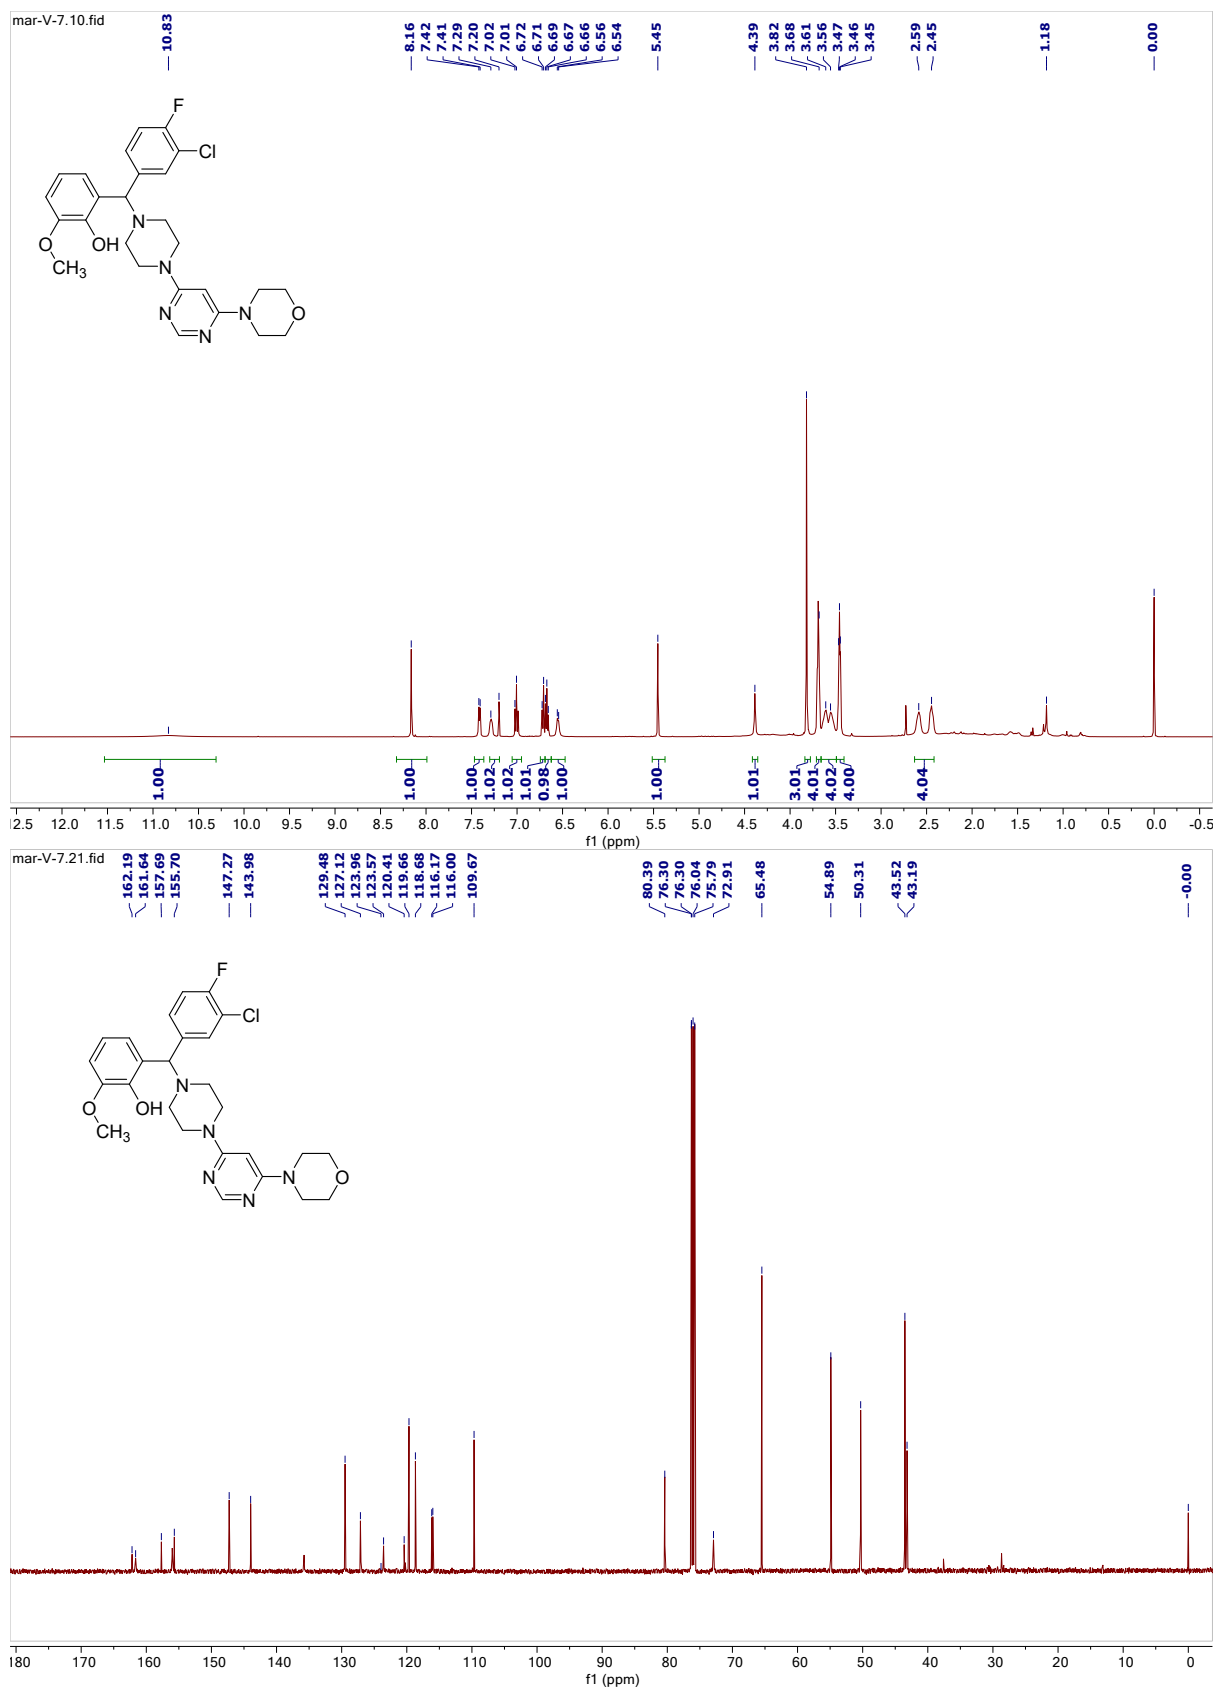

Figure 19: Top: 500 MHz <sup>1</sup>H-NMR of 2-2-((3-chloro-4-fluorophenyl)(4-(6-morpholinopyrimidin-4-yl)piperazin-1-yl)methyl)-6-methoxyphenol (**V7**). Bottom: 126 MHz <sup>13</sup>C-NMR of 2-((3-chloro-4-fluorophenyl)(4-(6-morpholinopyrimidin-4-yl)piperazin-1-yl)methyl)-6-methoxyphenol (**V7**).

## Mass Spectrum List Report

### Analysis Info

Analysis Name D:\Data\maxis2022\18940.d  
 Method ESI\_pos\_50\_1500\_os.m  
 Sample Name V7  
 Comment

Acquisition Date 20-Jun-22 9:58:34 AM

Operator Erlend  
 Instrument maXis II ETD 1823391.22318

### Acquisition Parameter

|             |            |                      |        |                  |           |
|-------------|------------|----------------------|--------|------------------|-----------|
| Source Type | ESI        | Set Capillary        | 3500 V | Set Nebulizer    | 1.0 Bar   |
| Focus       | Not active | Set End Plate Offset | -500 V | Set Dry Heater   | 200 °C    |
| Scan Begin  | 50 m/z     | Set Charging Voltage | 2000 V | Set Dry Gas      | 4.0 l/min |
| Scan End    | 1500 m/z   | Set Corona           | 0 nA   | Set Divert Valve | Waste     |
|             |            |                      |        | Set APCI Heater  | 0 °C      |

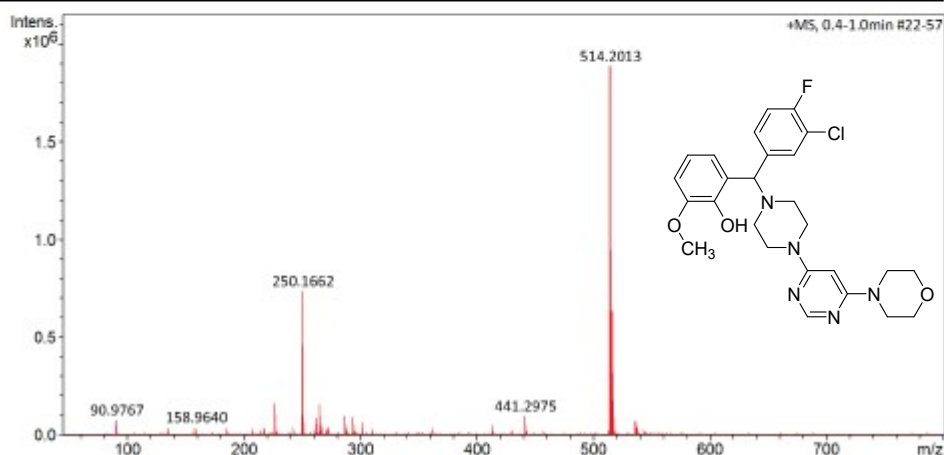

| #  | m/z      | Res.  | S/N     | I       | I%    | FWHM   |
|----|----------|-------|---------|---------|-------|--------|
| 1  | 90.9767  | 23435 | 3321.8  | 76645   | 4.1   | 0.0039 |
| 2  | 135.0030 | 26866 | 1519.4  | 35371   | 1.9   | 0.0050 |
| 3  | 158.9640 | 26433 | 1584.1  | 38396   | 2.0   | 0.0056 |
| 4  | 185.1149 | 30111 | 979.2   | 25981   | 1.4   | 0.0061 |
| 5  | 217.1047 | 31945 | 1187.3  | 35089   | 1.9   | 0.0068 |
| 6  | 226.9515 | 33662 | 5267.0  | 164760  | 8.7   | 0.0067 |
| 7  | 227.1254 | 32238 | 842.6   | 26335   | 1.4   | 0.0070 |
| 8  | 242.9250 | 31784 | 841.1   | 27238   | 1.4   | 0.0076 |
| 9  | 250.1662 | 32703 | 21691.6 | 736259  | 39.0  | 0.0076 |
| 10 | 251.1692 | 30266 | 2943.7  | 100752  | 5.3   | 0.0083 |
| 11 | 262.1662 | 34892 | 2358.2  | 88311   | 4.7   | 0.0075 |
| 12 | 265.0426 | 34022 | 4182.8  | 159776  | 8.5   | 0.0078 |
| 13 | 267.0397 | 35026 | 1344.3  | 52108   | 2.8   | 0.0076 |
| 14 | 270.9777 | 33834 | 789.4   | 31862   | 1.7   | 0.0080 |
| 15 | 273.1673 | 34012 | 1101.3  | 44871   | 2.4   | 0.0080 |
| 16 | 287.0246 | 36305 | 2114.7  | 96075   | 5.1   | 0.0079 |
| 17 | 289.0217 | 35182 | 660.0   | 30307   | 1.6   | 0.0082 |
| 18 | 294.1925 | 34656 | 2002.7  | 94871   | 5.0   | 0.0085 |
| 19 | 301.1411 | 35897 | 1361.8  | 66869   | 3.5   | 0.0084 |
| 20 | 362.9265 | 37525 | 399.1   | 28087   | 1.5   | 0.0097 |
| 21 | 413.2663 | 38265 | 585.8   | 53361   | 2.8   | 0.0108 |
| 22 | 441.2975 | 38798 | 954.2   | 95371   | 5.1   | 0.0114 |
| 23 | 442.3010 | 38321 | 265.6   | 26654   | 1.4   | 0.0115 |
| 24 | 514.2013 | 39372 | 15114.8 | 1886023 | 100.0 | 0.0131 |
| 25 | 515.2044 | 38047 | 4460.1  | 556882  | 29.5  | 0.0135 |
| 26 | 516.1989 | 36819 | 5120.9  | 638992  | 33.9  | 0.0140 |
| 27 | 517.2018 | 36908 | 1437.1  | 179048  | 9.5   | 0.0140 |
| 28 | 518.2046 | 35396 | 233.7   | 29156   | 1.5   | 0.0146 |
| 29 | 536.1834 | 40237 | 569.8   | 74018   | 3.9   | 0.0133 |
| 30 | 538.1810 | 36890 | 193.6   | 25269   | 1.3   | 0.0146 |

18940.d

Bruker Compass DataAnalysis 4.3

printed: 20-Jun-22 10:02:44 AM

by: Erlend

Page 1 of 1

Figure 20: HRMS report of 2-((3-chloro-4-fluorophenyl)(4-(6-morpholinopyrimidin-4-yl)piperazin-1-yl)methyl)-6-methoxyphenol (V7).

# Elemental Analysis Report

|               |                      |                  |                           |
|---------------|----------------------|------------------|---------------------------|
| Analysis Info |                      | Acquisition Date | 20-Jun-22 9:58:34 AM      |
| Sample Name   | V7                   | Analysis Name    | D:\Data\maxis2022\18940.d |
| Method        | ESI_pos_50_1500_os.m |                  |                           |

## Acquisition Parameter

|             |            |                      |        |                  |           |
|-------------|------------|----------------------|--------|------------------|-----------|
| Source Type | ESI        | Set Capillary        | 3500 V | Set Nebulizer    | 1.0 Bar   |
| Focus       | Not active | Set End Plate Offset | -500 V | Set Dry Heater   | 200 °C    |
| Scan Begin  | 50 m/z     | Set Charging Voltage | 2000 V | Set Dry Gas      | 4.0 l/min |
| Scan End    | 1500 m/z   | Set Corona           | 0 nA   | Set Divert Valve | Waste     |
|             |            |                      |        | Set APCI Heater  | 0 °C      |

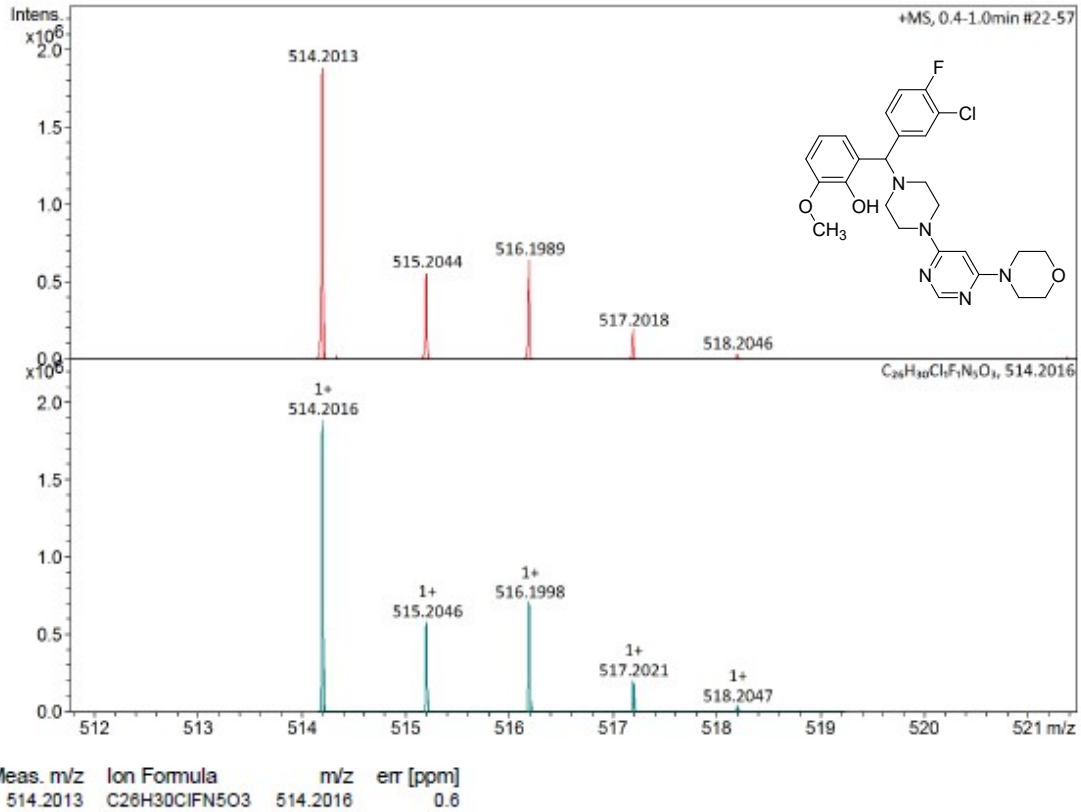

Figure 21: Elemental analysis report of 2-((3-chloro-4-fluorophenyl)(4-(6-morpholinopyrimidin-4-yl)piperazin-1-yl)methyl)-6-methoxyphenol (V7).

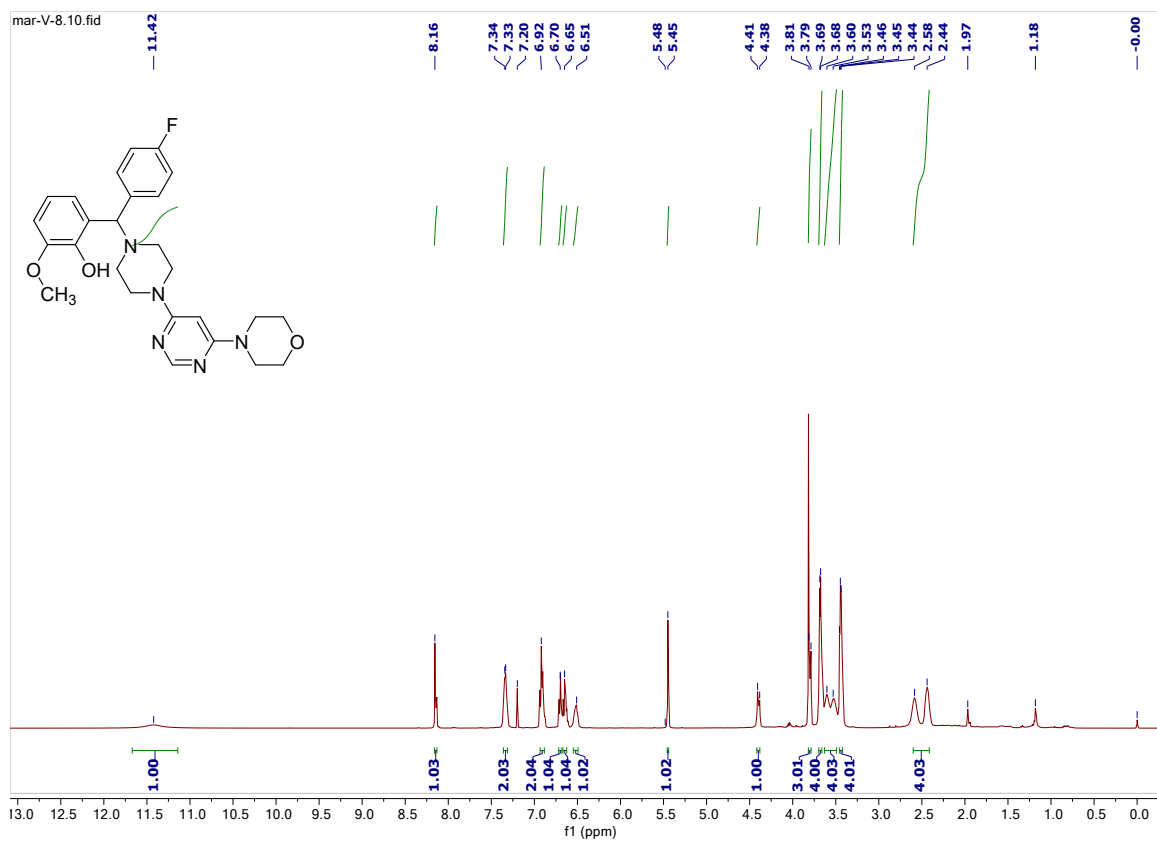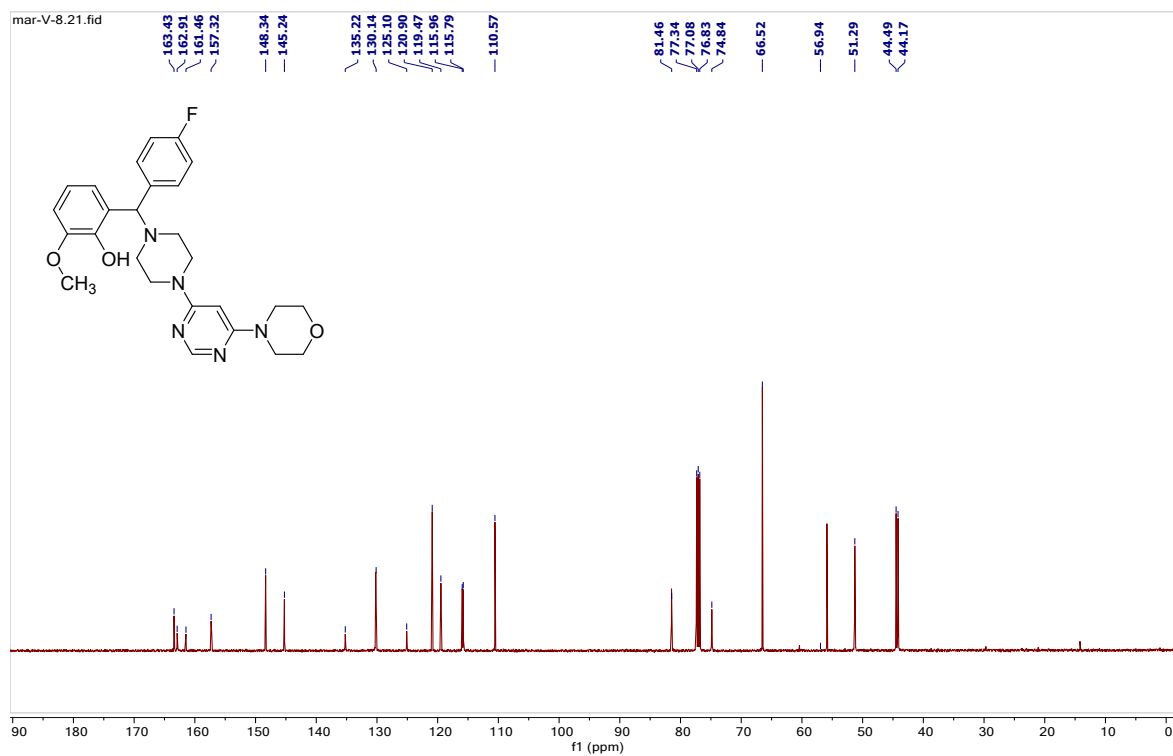

Figure 22: Top: 500 MHz <sup>1</sup>H-NMR of 2-((4-fluorophenyl)(4-(6-morpholinopyrimidin-4-yl)piperazin-1-yl)methyl)-6-methoxyphenol (**V8**). Bottom: 126 MHz <sup>13</sup>C-NMR of 2-((4-fluorophenyl)(4-(6-morpholinopyrimidin-4-yl)piperazin-1-yl)methyl)-6-methoxyphenol (**V8**).



## Mass Spectrum List Report

### Analysis Info

Analysis Name D:\Data\maxis2022\18941.d  
 Method ESI\_pos\_50\_1500\_os.m  
 Sample Name V8  
 Comment

Acquisition Date 20-Jun-22 10:15:06 AM

Operator Erlend  
 Instrument maXis II ETD 1823391.22318

### Acquisition Parameter

|             |            |                      |        |                  |           |
|-------------|------------|----------------------|--------|------------------|-----------|
| Source Type | ESI        | Set Capillary        | 3500 V | Set Nebulizer    | 0.3 Bar   |
| Focus       | Not active | Set End Plate Offset | -500 V | Set Dry Heater   | 200 °C    |
| Scan Begin  | 50 m/z     | Set Charging Voltage | 2000 V | Set Dry Gas      | 4.0 l/min |
| Scan End    | 1500 m/z   | Set Corona           | 0 nA   | Set Divert Valve | Waste     |
|             |            |                      |        | Set APCI Heater  | 0 °C      |

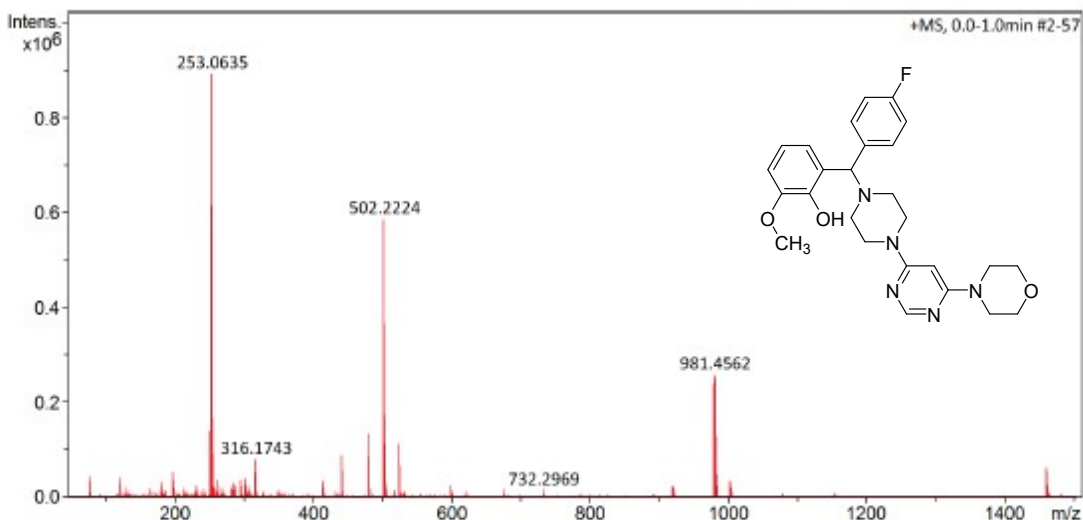

| #  | m/z       | Res.  | S/N     | I      | I %   | FWHM   |
|----|-----------|-------|---------|--------|-------|--------|
| 1  | 76.9973   | 21951 | 2854.1  | 44487  | 5.0   | 0.0035 |
| 2  | 120.9872  | 26437 | 2630.6  | 41244  | 4.6   | 0.0046 |
| 3  | 181.0819  | 31336 | 1931.4  | 32461  | 3.6   | 0.0058 |
| 4  | 197.0341  | 30532 | 3053.0  | 53365  | 6.0   | 0.0065 |
| 5  | 250.1662  | 32652 | 7276.6  | 142259 | 15.9  | 0.0077 |
| 6  | 253.0635  | 33783 | 45723.0 | 893087 | 100.0 | 0.0075 |
| 7  | 254.0669  | 33527 | 6993.9  | 136555 | 15.3  | 0.0076 |
| 8  | 262.1662  | 35085 | 1824.9  | 36611  | 4.1   | 0.0075 |
| 9  | 285.0897  | 34178 | 1319.4  | 29624  | 3.3   | 0.0083 |
| 10 | 294.1924  | 34833 | 1536.1  | 35834  | 4.0   | 0.0084 |
| 11 | 301.1410  | 35918 | 1623.2  | 39030  | 4.4   | 0.0084 |
| 12 | 307.0717  | 36685 | 1000.6  | 25261  | 2.8   | 0.0084 |
| 13 | 316.1743  | 35715 | 2934.8  | 78567  | 8.8   | 0.0089 |
| 14 | 413.2663  | 38535 | 732.6   | 35491  | 4.0   | 0.0107 |
| 15 | 441.2975  | 38669 | 1626.9  | 88363  | 9.9   | 0.0114 |
| 16 | 480.2405  | 39490 | 2049.7  | 134842 | 15.1  | 0.0122 |
| 17 | 481.2438  | 37498 | 609.1   | 40225  | 4.5   | 0.0128 |
| 18 | 502.2224  | 39398 | 8112.7  | 585391 | 65.5  | 0.0127 |
| 19 | 503.2255  | 38623 | 2400.9  | 173545 | 19.4  | 0.0130 |
| 20 | 504.2285  | 36655 | 382.1   | 27692  | 3.1   | 0.0138 |
| 21 | 524.2044  | 40169 | 1453.9  | 111597 | 12.5  | 0.0131 |
| 22 | 525.2075  | 38609 | 427.3   | 32875  | 3.7   | 0.0136 |
| 23 | 600.2205  | 40981 | 273.6   | 24736  | 2.8   | 0.0146 |
| 24 | 981.4562  | 43522 | 3710.2  | 257488 | 28.8  | 0.0226 |
| 25 | 982.4593  | 43027 | 2237.2  | 155184 | 17.4  | 0.0228 |
| 26 | 983.4623  | 42133 | 703.3   | 48763  | 5.5   | 0.0233 |
| 27 | 1003.4384 | 44234 | 516.9   | 34614  | 3.9   | 0.0227 |
| 28 | 1460.6912 | 44146 | 1689.8  | 63702  | 7.1   | 0.0331 |
| 29 | 1461.6942 | 44191 | 1573.8  | 59327  | 6.6   | 0.0331 |
| 30 | 1462.6972 | 43571 | 725.3   | 27341  | 3.1   | 0.0336 |

18941.d

Bruker Compass DataAnalysis 4.3

printed: 20-Jun-22 10:20:50 AM

by: Erlend

Page 1 of 1

Figure 23: HRMS report of 2-((4-fluorophenyl)(4-(6-morpholinopyrimidin-4-yl)piperazin-1-yl)methyl)-6-methoxyphenol (V8).

## Elemental Analysis Report

|                             |                                         |
|-----------------------------|-----------------------------------------|
| <b>Analysis Info</b>        | Acquisition Date 20-Jun-22 10:15:06 AM  |
| Sample Name V8              | Analysis Name D:\Data\maxis2022\18941.d |
| Method ESI_pos_50_1500_os.m |                                         |

### Acquisition Parameter

|             |            |                      |        |                  |           |
|-------------|------------|----------------------|--------|------------------|-----------|
| Source Type | ESI        | Set Capillary        | 3500 V | Set Nebulizer    | 0.3 Bar   |
| Focus       | Not active | Set End Plate Offset | -500 V | Set Dry Heater   | 200 °C    |
| Scan Begin  | 50 m/z     | Set Charging Voltage | 2000 V | Set Dry Gas      | 4.0 l/min |
| Scan End    | 1500 m/z   | Set Corona           | 0 nA   | Set Divert Valve | Waste     |
|             |            |                      |        | Set APCI Heater  | 0 °C      |

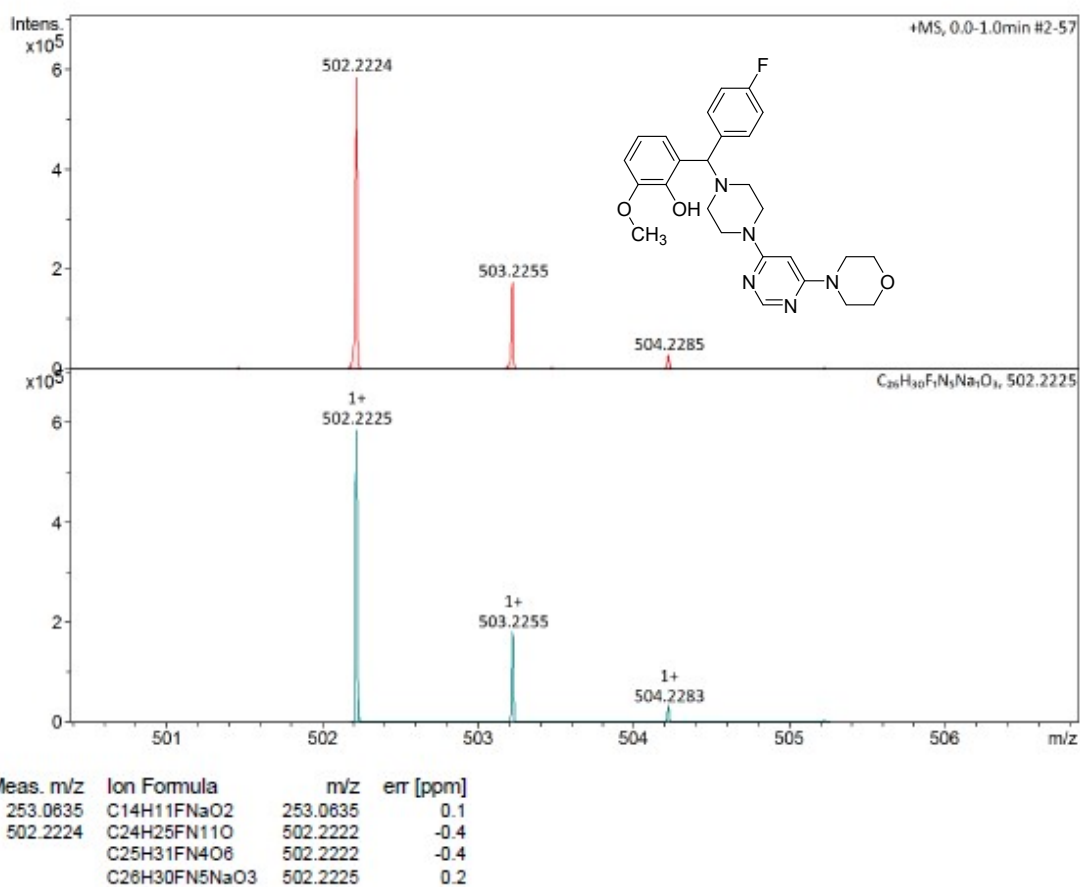

Figure 24: Elemental analysis report of 2-((4-fluorophenyl)(4-(6-morpholinopyrimidin-4-yl)piperazin-1-yl)methyl)-6-methoxyphenol (**V8**).



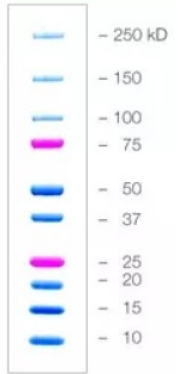

Inos

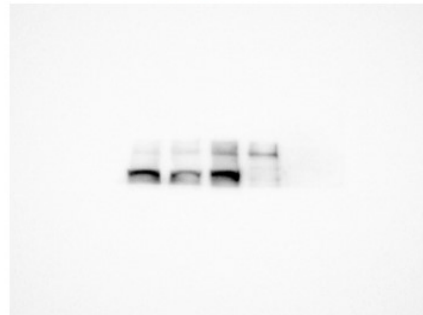

cox 2

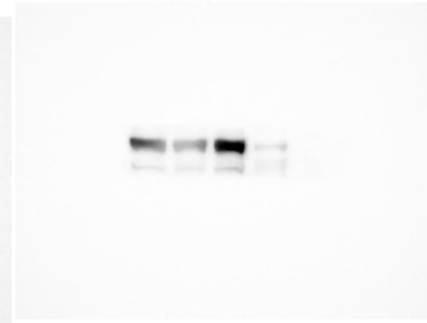

gapdh

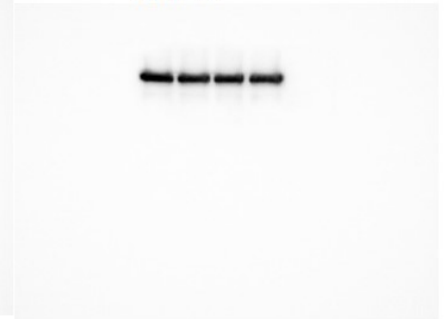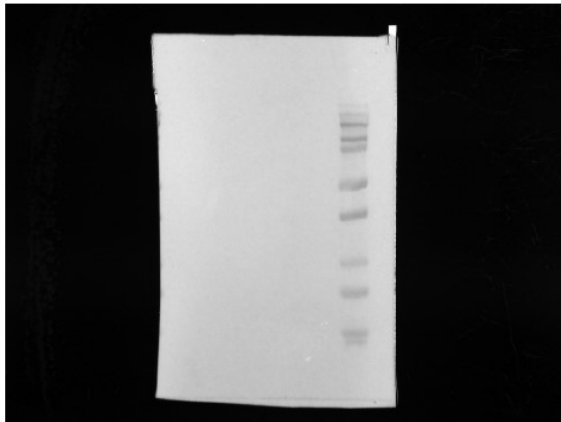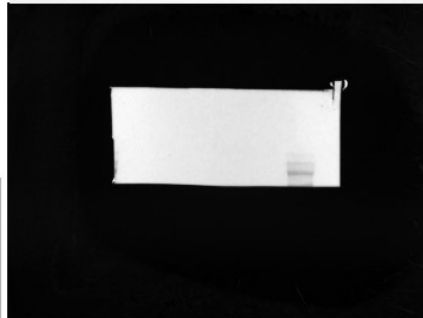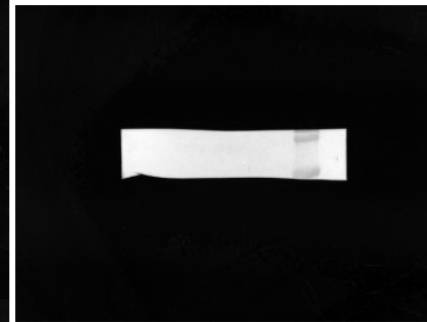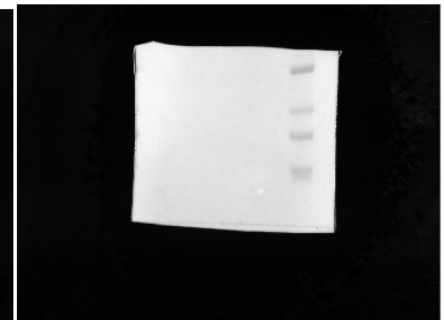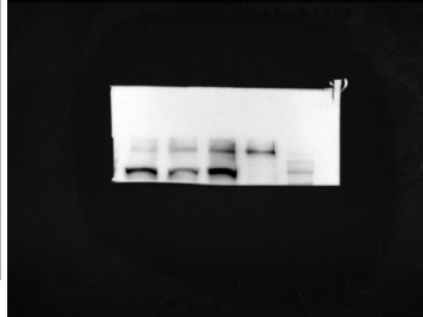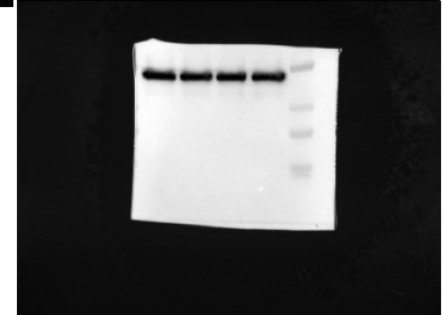

|   |           |        |
|---|-----------|--------|
| 1 | 35148.702 | 26.415 |
| 2 | 28671.530 | 21.547 |
| 3 | 33009.803 | 24.807 |
| 4 | 36234.167 | 27.231 |

GAPDH

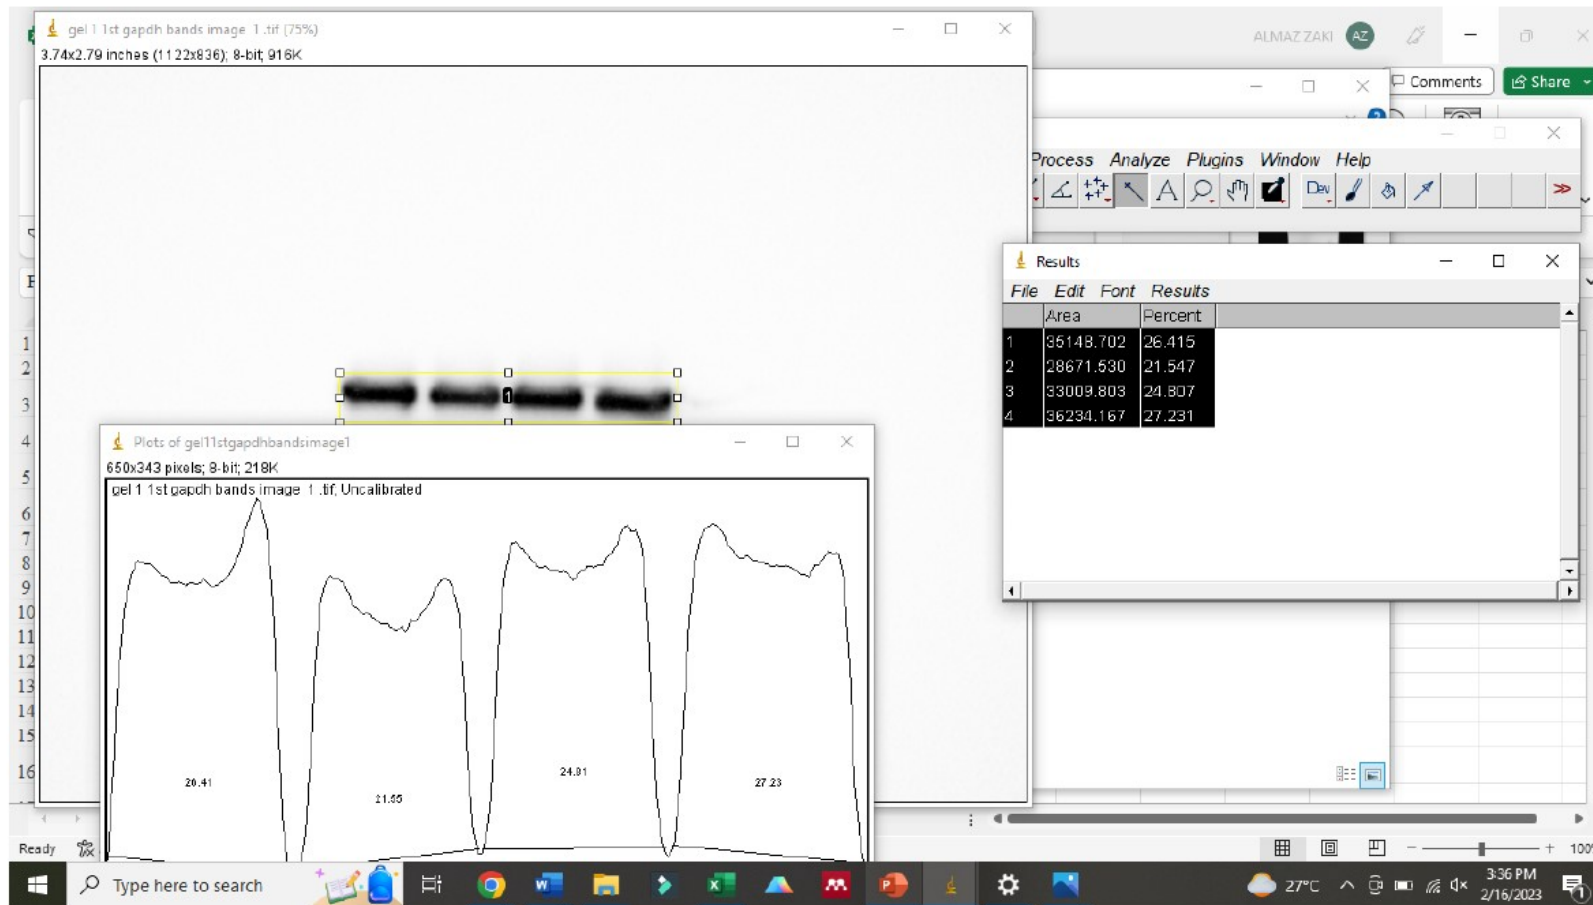



|   |           |        |       |
|---|-----------|--------|-------|
| 1 | 29166.338 | 34.684 |       |
| 2 | 19667.903 | 23.389 | COX-2 |
| 3 | 34435.459 | 40.950 |       |
| 4 | 822.406   | 0.978  |       |

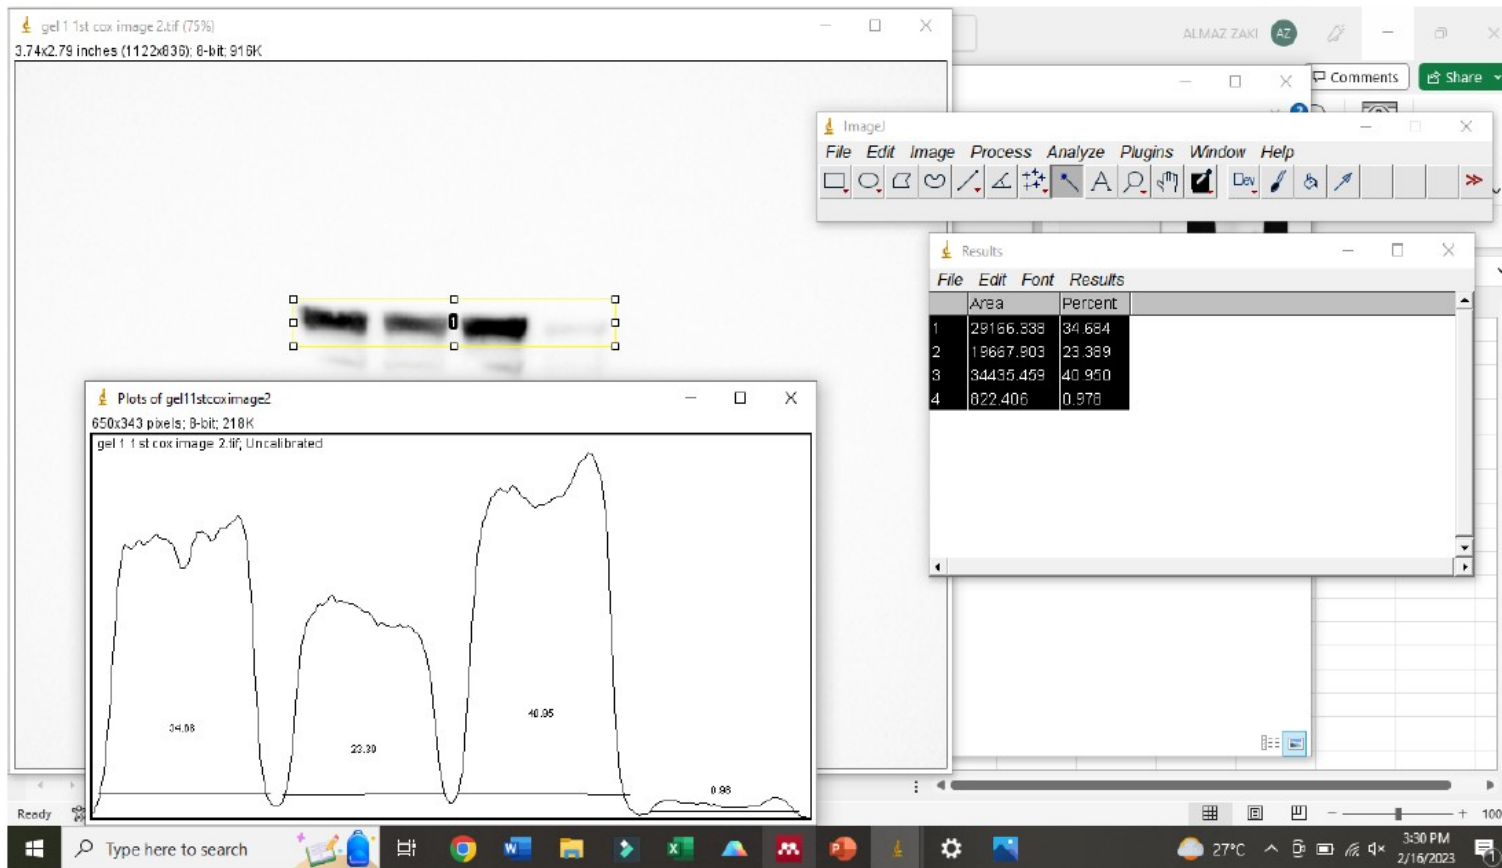

# iNOS

The screenshot displays the iNOS software interface with several windows open. The main window shows a gel image with four bands. A yellow box highlights the bands, and a plot below it shows the intensity profile of these bands. The plot has four peaks labeled with their respective percentages: 33.98, 20.30, 45.04, and 0.68. A results table in the center window provides the following data:

| Line | Area      | Percent |
|------|-----------|---------|
| 1    | 24341.510 | 33.979  |
| 2    | 14543.167 | 20.301  |
| 3    | 32268.066 | 45.044  |
| 4    | 484.335   | 0.676   |

The interface also includes a 'Format Background' panel on the right with options for fill (Solid, Gradient, Picture or texture, Pattern) and background graphics. The bottom status bar shows 'Slide 9 of 9', 'Accessibility: Investigate', and system information like '25°C' and '5:56 PM 2/16/2023'.



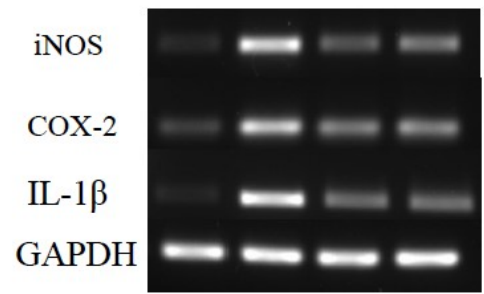

GAPDH

iNOS

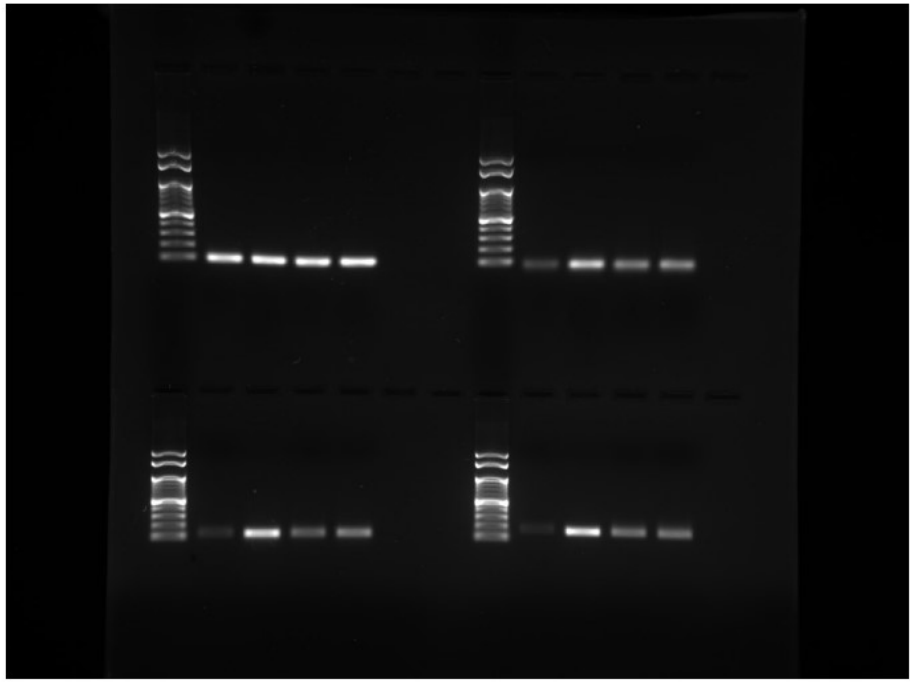

COX-2

IL-1β

|   |           |        |
|---|-----------|--------|
| 1 | 30756.924 | 23.428 |
| 2 | 32664.267 | 24.881 |
| 3 | 32922.631 | 25.078 |
| 4 | 34939.167 | 26.614 |

# GAPDH

The screenshot displays a software interface for image analysis. The main window shows a gel electrophoresis image with four lanes. A densitometry plot is overlaid on the gel, showing four distinct peaks. The x-axis of the plot is labeled with values: 23.40, 24.88, 25.08, and 26.61. A 'Results' window is open, showing a table with the following data:

| File | Area      | Percent |
|------|-----------|---------|
| 1    | 30756.924 | 23.428  |
| 2    | 32664.267 | 24.881  |
| 3    | 32922.631 | 25.078  |
| 4    | 34939.167 | 26.614  |

The software interface also shows various toolbars and a status bar at the bottom indicating 'Slide 7 of 7' and system information like '21°C Sunny' and '9:43 AM 2/19/2023'.

|   |           |        |
|---|-----------|--------|
| 1 | 7512.518  | 9.197  |
| 2 | 32839.995 | 40.206 |
| 3 | 19374.803 | 23.720 |
| 4 | 21952.752 | 26.877 |

COX-2

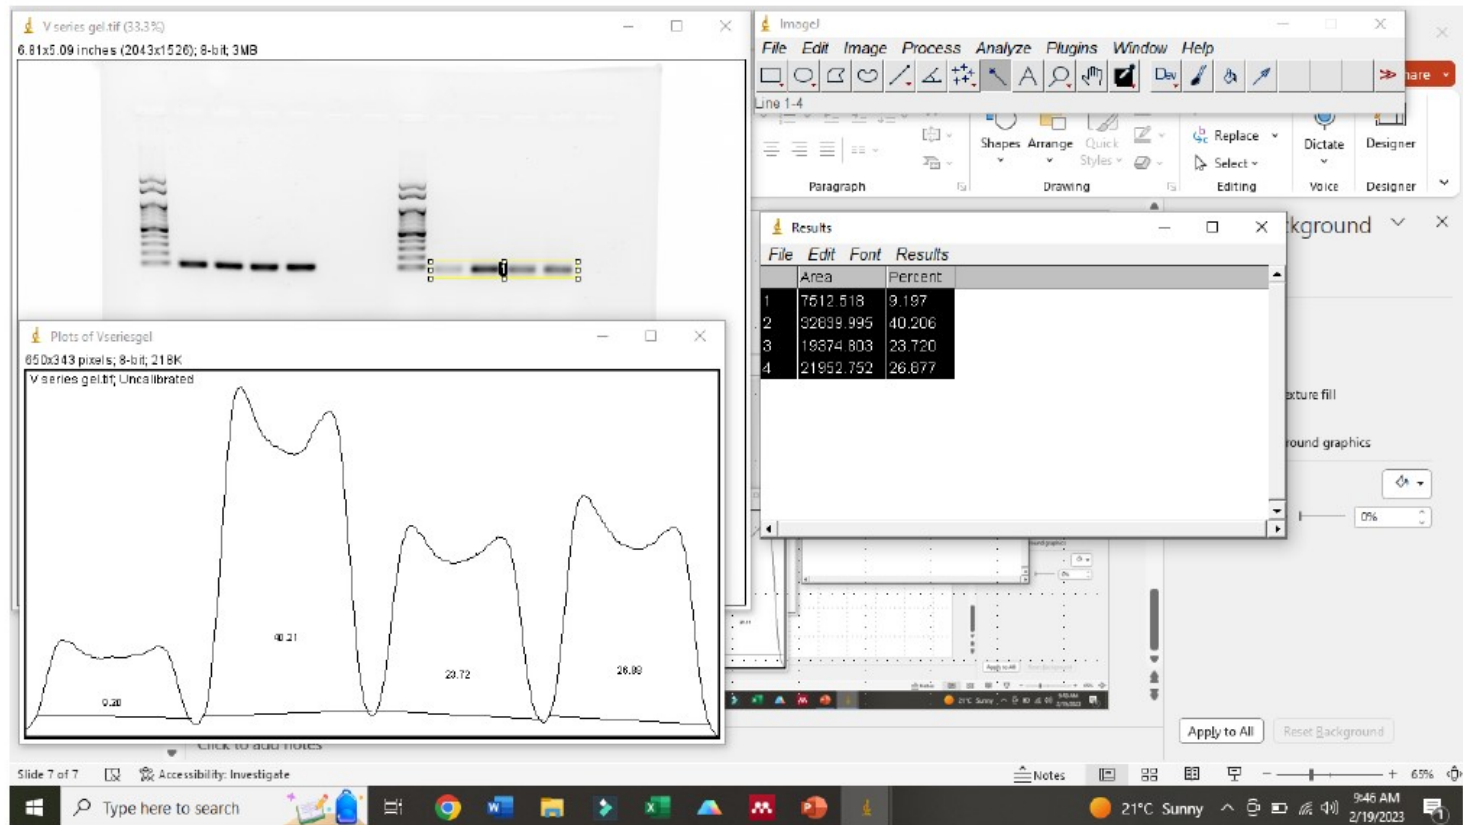

|   |           |        |      |
|---|-----------|--------|------|
| 1 | 3752.154  | 5.513  |      |
| 2 | 35064.217 | 51.518 | iNOS |
| 3 | 11469.832 | 16.852 |      |
| 4 | 17775.903 | 26.117 |      |

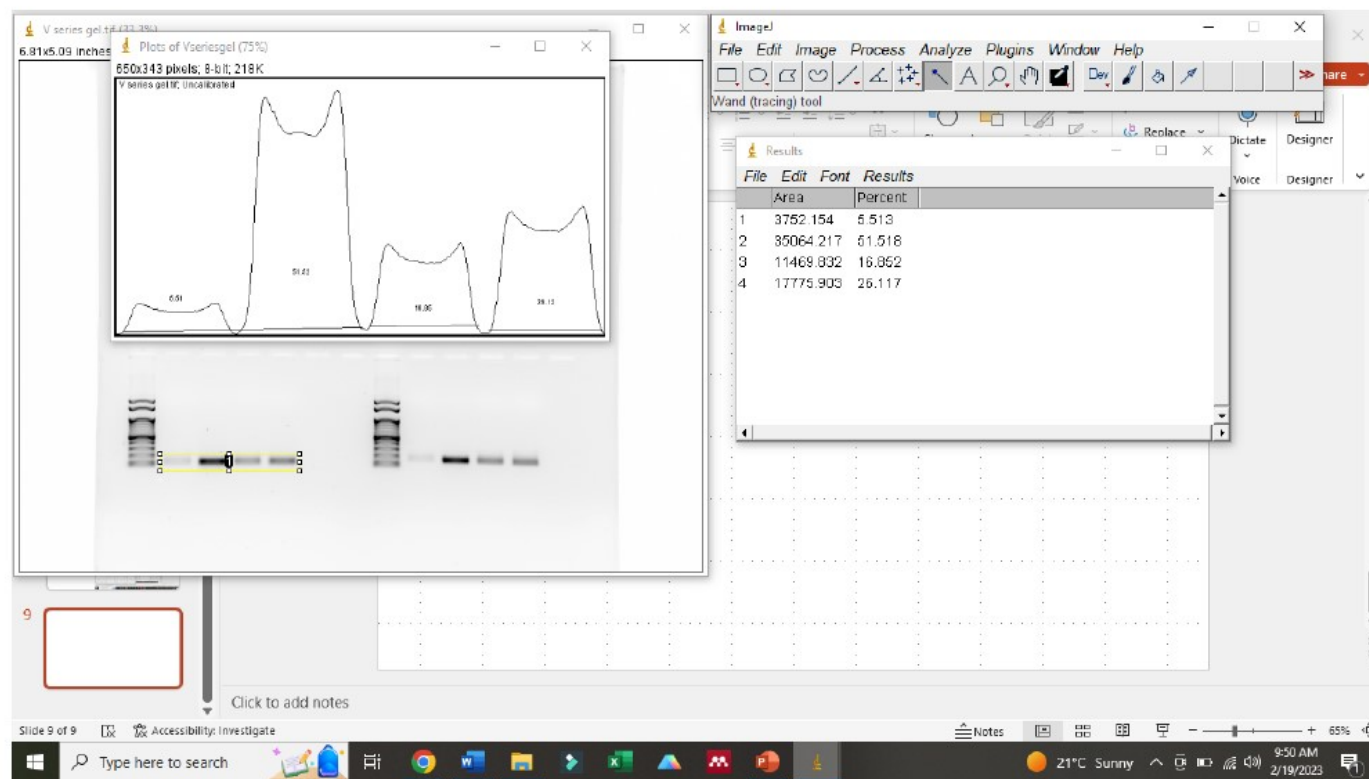

|   |           |        |              |
|---|-----------|--------|--------------|
| 1 | 1960.004  | 0.910  |              |
| 2 | 35111.359 | 16.295 | IL-1 $\beta$ |
| 3 | 15228.711 | 7.067  |              |
| 4 | 17020.004 | 7.899  |              |

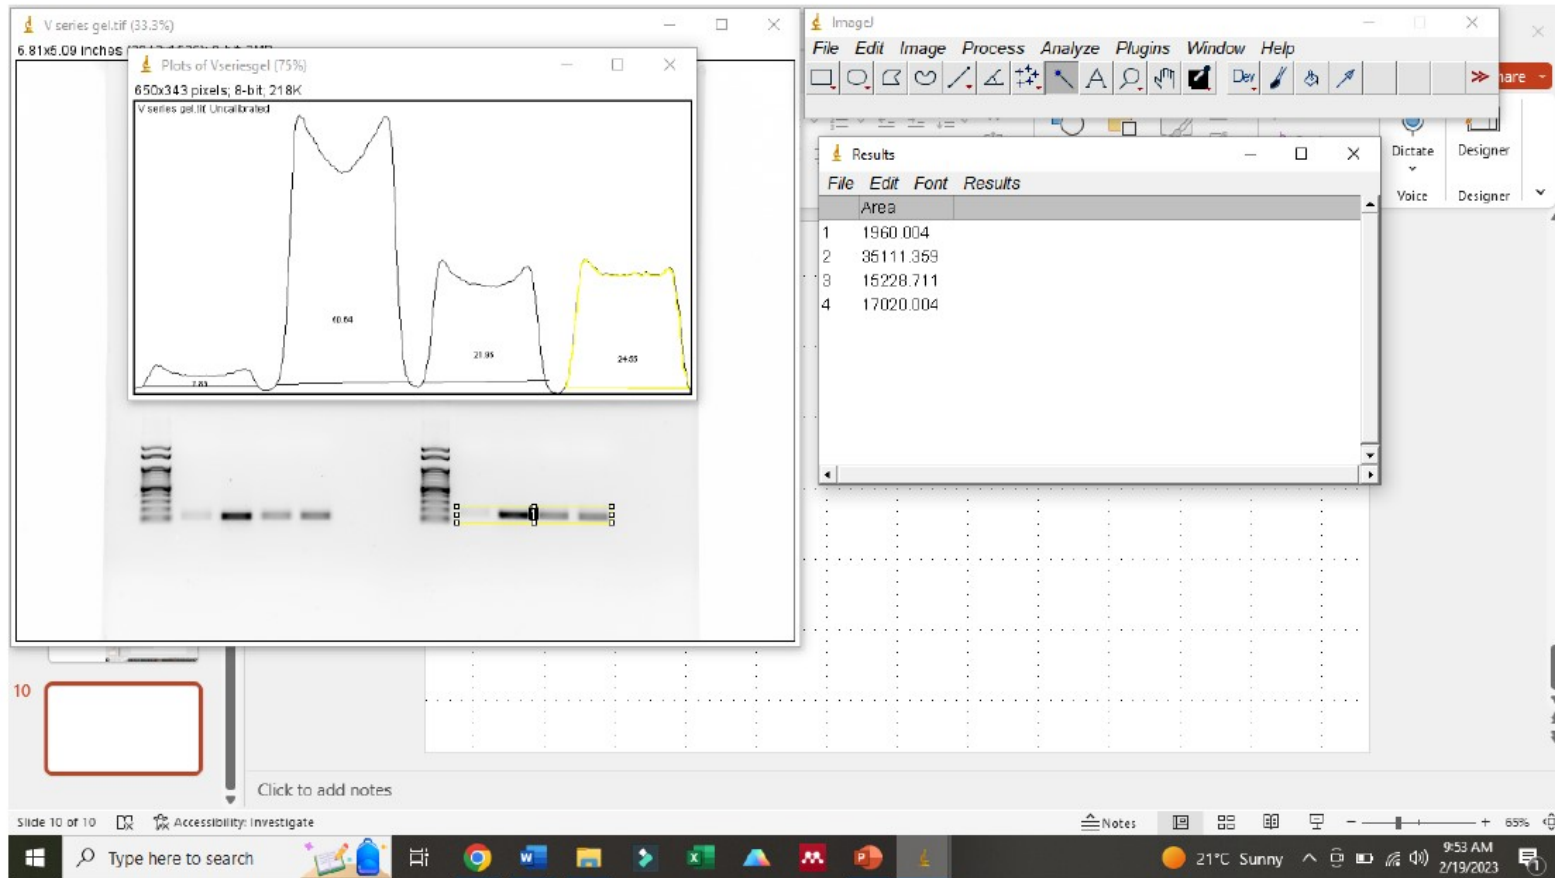

Supplement: d3ra01893h1.pdf [file d3ra01893h1.pdf]
